# Supplementary material for: Assessing methanotrophy and carbon fixation for biofuel production by Methanosarcina acetivorans
Source: PubMed Central journal article supplement (PMC4716644; doi:10.1186/s12934-015-0404-4), 2016-01-17
Supplement: 12934_2015_404_MOESM2_ESM.pdf [file 12934_2015_404_MOESM2_ESM.pdf]

| Locus_tag | Length | Gi                       | Old Product Name                                                  | New Product Name (a)                                                                                          | Confidence Level | Expressed in MA (b) | Change in Annotation | COG(s)    |
|-----------|--------|--------------------------|-------------------------------------------------------------------|---------------------------------------------------------------------------------------------------------------|------------------|---------------------|----------------------|-----------|
| MA0001    | 420    | <a href="#">20088900</a> | <a href="#">cell division control protein 6</a>                   | <a href="#">ORC complex protein Cdc6/Orc1</a>                                                                 | CL2              | nd                  | more specific        | COG1474LO |
| MA0002    | 125    | <a href="#">20088901</a> | <a href="#">hypothetical protein MA0002</a>                       | <a href="#">hypothetical protein MA0002</a>                                                                   | CL5              | nd                  | no change            | -         |
| MA0003    | 514    | <a href="#">20088902</a> | <a href="#">sodium:proline symporter</a>                          | <a href="#">sodium:proline symporter putP</a>                                                                 | CL2              | nd                  | no change            | COG0591ER |
| MA0004    | 257    | <a href="#">20088903</a> | <a href="#">IstB helper protein</a>                               | <a href="#">IstB helper protein</a>                                                                           | CL2              | nd                  | no change            | COG1484L  |
| MA0005    | 414    | <a href="#">20088904</a> | <a href="#">transposase</a>                                       | <a href="#">transposase</a>                                                                                   | CL3              | nd                  | no change            | COG4584L  |
| MA0006    | 395    | <a href="#">20088905</a> | <a href="#">L-tyrosine decarboxylase</a>                          | <a href="#">L-tyrosine decarboxylase</a>                                                                      | CL2              | Yes                 | no change            | COG0076E  |
| MA0010    | 297    | <a href="#">20088909</a> | <a href="#">tetrahydromethanopterin formyltransferase</a>         | <a href="#">formylmethanofuran--tetrahydromethanopterin formyltransferase (ftr) (EC 2.3.1.101)</a>            | CL2              | Yes                 | more specific        | COG2037C  |
| MA0031    | 296    | <a href="#">20088930</a> | <a href="#">pyruvate synthase, subunit beta</a>                   | <a href="#">Pyruvate synthase beta chain (pyruvate:ferredoxin oxidoreductase beta subunit) (EC 1.2.7.1)</a>   | CL2              | Yes                 | no change            | COG1013C  |
| MA0032    | 403    | <a href="#">20088931</a> | <a href="#">pyruvate synthase, subunit alpha</a>                  | <a href="#">Pyruvate synthase subunit porA (Pyruvate oxidoreductase alpha chain) (EC 1.2.7.1) (porA)</a>      | CL2              | Yes                 | no change            | COG0674C  |
| MA0033    | 86     | <a href="#">20088932</a> | <a href="#">pyruvate synthase, subunit delta</a>                  | <a href="#">Pyruvate synthase delta chain (pyruvate:ferredoxin oxidoreductase delta subunit) (EC 1.2.7.1)</a> | CL2              | Yes                 | no change            | COG1144C  |
| MA0034    | 182    | <a href="#">20088933</a> | <a href="#">pyruvate ferredoxin oxidoreductase subunit gamma</a>  | <a href="#">Pyruvate synthase gamma chain (pyruvate:ferredoxin oxidoreductase gamma subunit) (EC 1.2.7.1)</a> | CL2              | Yes                 | no change            | COG1014C  |
| MA0042    | 415    | <a href="#">20088941</a> | <a href="#">peptide chain release factor 1</a>                    | <a href="#">peptide chain release factor eRF/aRF, subunit 1</a>                                               | CL2              | Yes                 | no change            | COG1503J  |
| MA0055    | 56     | <a href="#">20088954</a> | <a href="#">hypothetical protein</a>                              | <a href="#">hypothetical protein</a>                                                                          | CL5              | nd                  | no change            | COG3609K  |
| MA0056    | 71     | <a href="#">10000000</a> | <a href="#">hypothetical protein</a>                              | <a href="#">conserved hypothetical protein</a>                                                                | CL5              | Yes                 | no change            | COG3269R  |
| MA0057    | 71     | <a href="#">4E+11</a>    | <a href="#">hypothetical protein</a>                              | <a href="#">conserved hypothetical protein</a>                                                                | CL5              | Yes                 | no change            | COG3269R  |
| MA0058    | 71     | <a href="#">1.00E-30</a> | <a href="#">hypothetical protein</a>                              | <a href="#">putative uncharacterized protein</a>                                                              | CL5              | Yes                 | no change            | COG3269R  |
| MA0059    |        | <a href="#">9.00E-32</a> | <a href="#">hypothetical protein</a>                              | <a href="#">conserved hypothetical protein</a>                                                                | CL5              | Yes                 | no change            | COG3269R  |
| MA0063    | 268    | <a href="#">20088962</a> | <a href="#">sulfonate ABC transporter, ATP-binding protein</a>    | <a href="#">ABC transporter ATPase subunit (ssuB)</a>                                                         | CL2              | nd                  | less specific        | COG1116P  |
| MA0064    | 262    | <a href="#">20088963</a> | <a href="#">sulfonate ABC transporter, permease protein</a>       | <a href="#">ABC transporter permease protein</a>                                                              | CL4              | Yes                 | less specific        | COG0600P  |
| MA0065    | 337    | <a href="#">20088964</a> | <a href="#">sulfonate ABC transporter, solute-binding protein</a> | <a href="#">ABC transporter, substrate binding protein</a>                                                    | CL4              | Yes                 | less specific        | COG0715P  |

|        |      |                          |                                                                   |                                                                                                                                                |     |     |               |                       |
|--------|------|--------------------------|-------------------------------------------------------------------|------------------------------------------------------------------------------------------------------------------------------------------------|-----|-----|---------------|-----------------------|
| MA0067 | 173  | <a href="#">20088966</a> | <a href="#">hypothetical protein MA0067</a>                       | <a href="#">Helix-turn-helix (HTH) 3-containing transcriptional regulator, XRE family</a>                                                      | CL4 | Yes | more specific | COG4800K              |
| MA0068 | 1167 | <a href="#">20088967</a> | <a href="#">hypothetical protein MA0068</a>                       | <a href="#">Protein of unknown function DUF1608</a>                                                                                            | CL4 | Yes | more specific | COG1472G              |
| MA0072 | 794  | <a href="#">20088971</a> | <a href="#">anaerobic ribonucleoside-triphosphate reductase</a>   | <a href="#">anaerobic ribonucleoside-triphosphate reductase</a>                                                                                | CL3 | Yes | no change     | COG1328F              |
| MA0074 | 267  | <a href="#">20088973</a> | <a href="#">DNA repair and recombination protein RadB</a>         | <a href="#">DNA repair and recombination protein RadB</a>                                                                                      | CL2 | Yes | no change     | COG0468L              |
| MA0076 | 348  | <a href="#">20088975</a> | <a href="#">translation initiation factor IF-2B subunit alpha</a> | <a href="#">Ribose-1,5-bisphosphate isomerase</a>                                                                                              | CL2 | Yes | more specific | COG0182J              |
| MA0082 | 69   | <a href="#">20088981</a> | <a href="#">hypothetical protein MA0082</a>                       | <a href="#">Hypothetical protein</a>                                                                                                           | CL5 | nd  | no change     | -                     |
| MA0086 | 552  | <a href="#">20088985</a> | <a href="#">Hsp60</a>                                             | <a href="#">Thermosome subunit (Chaperonin)</a>                                                                                                | CL2 | Yes | no change     | COG0459O              |
| MA0090 | 539  | <a href="#">20088989</a> | <a href="#">O-phosphoserine-tRNA synthetase</a>                   | <a href="#">O-phosphoserine-tRNA(Cys) synthetase (EC 6.1.1.-)</a>                                                                              | CL2 | Yes | no change     | COG2024J              |
| MA0092 | 97   | <a href="#">20088991</a> | <a href="#">hypothetical protein MA0092</a>                       | <a href="#">Protein of unknown function UPF0147</a>                                                                                            | CL4 | Yes | more specific | COG1698S              |
| MA0096 | 821  | <a href="#">20088995</a> | <a href="#">Hef nuclease</a>                                      | <a href="#">Hef helicase</a>                                                                                                                   | CL2 | nd  | more specific | COG1111L,<br>COG1948L |
| MA0097 | 612  | <a href="#">20088996</a> | <a href="#">glycyl-tRNA synthetase</a>                            | <a href="#">Glycyl-tRNA synthetase (EC6.1.1.14)</a>                                                                                            | CL3 | Yes | no change     | COG0423J              |
| MA0104 | 267  | <a href="#">20089003</a> | <a href="#">stationary phase survival protein SurE</a>            | <a href="#">Stationary-phase survival protein SurE (5'/3'-nucleotidase (EC 3.1.3.5) (EC 3.1.3.6); Exopolyphosphatase (EC 3.6.1.11)) (surE)</a> | CL3 | Yes | no change     | COG0496R              |
| MA0110 | 245  | <a href="#">20089009</a> | <a href="#">DNA polymerase sliding clamp</a>                      | <a href="#">proliferating cell nuclear antigen (PCNA)/archaeal DNA polymerase sliding clamp</a>                                                | CL2 | Yes | more specific | COG0592L              |
| MA0113 | 138  | <a href="#">20089012</a> | <a href="#">ADP-ribose pyrophosphatase</a>                        | <a href="#">ADP-ribose pyrophosphatase (Nudix hydrolase)</a>                                                                                   | CL2 | nd  | no change     | COG1051F              |
| MA0117 | 118  | <a href="#">20089016</a> | <a href="#">hypothetical protein MA0117</a>                       | <a href="#">Protein of unknown function with DUF381 and DUF372 domains</a>                                                                     | CL4 | nd  | more specific | COG2098S              |
| MA0119 | 405  | <a href="#">20089018</a> | <a href="#">acetylmethionine aminotransferase</a>                 | <a href="#">Acetylmethionine/acetyl-lysine aminotransferase (EC 2.6.1.11) (EC 2.6.1.-)</a>                                                     | CL2 | Yes | more specific | COG4992E              |
| MA0130 | 346  | <a href="#">20089029</a> | <a href="#">phosphoribosylaminoimidazole synthetase</a>           | <a href="#">Phosphoribosylformylglycinamide cyclo-ligase (AIRS) (purM) (EC 6.3.3.1)</a>                                                        | CL2 | Yes | no change     | COG0150F              |
| MA0136 | 150  | <a href="#">20089035</a> | <a href="#">dCMP deaminase</a>                                    | <a href="#">dCMP deaminase (EC 3.5.4.12)</a>                                                                                                   | CL2 | nd  | no change     | COG2131F              |
| MA0137 | 150  | <a href="#">20089036</a> | <a href="#">dCMP deaminase</a>                                    | <a href="#">dCMP deaminase (EC 3.5.4.12)</a>                                                                                                   | CL2 | Yes | no change     | COG2131F              |
| MA0143 | 468  | <a href="#">20089041</a> | <a href="#">ethanolamine permease</a>                             | <a href="#">amine permease</a>                                                                                                                 | CL4 | nd  | less specific | COG0531E              |

|        |     |                           |                                                                                                        |                                                                                                                                                           |     |     |               |                    |
|--------|-----|---------------------------|--------------------------------------------------------------------------------------------------------|-----------------------------------------------------------------------------------------------------------------------------------------------------------|-----|-----|---------------|--------------------|
| MA0145 | 218 | <a href="#">20089043</a>  | <a href="#">monomethylamine corrinoid protein (mtmC)</a>                                               | <a href="#">monomethylamine corrinoid protein (mtmC1)</a>                                                                                                 | CL2 | Yes | no change     | COG5012R           |
| MA0150 | 540 | <a href="#">20089048</a>  | <a href="#">methylamine methyltransferase corrinoid activation protein</a>                             | <a href="#">methylamine methyltransferase corrinoid activation protein</a>                                                                                | CL1 | Yes | more specific | COG1145C, COG3894R |
| MA0152 | 259 | <a href="#">2.00E-07</a>  | <a href="#">hypothetical protein</a>                                                                   | <a href="#">pyrrolysine synthesis protein</a>                                                                                                             | CL1 | Yes | more specific |                    |
| MA0153 | 363 | <a href="#">2.00E-07</a>  | <a href="#">hypothetical protein</a>                                                                   | <a href="#">pyrrolysine synthesis protein</a>                                                                                                             | CL1 | Yes | more specific |                    |
| MA0154 | 350 | <a href="#">20000000</a>  | <a href="#">biotin synthase (bioB)</a>                                                                 | <a href="#">pyrrolysine synthesis protein</a>                                                                                                             | CL1 | Yes | more specific |                    |
| MA0155 | 443 | <a href="#">161484944</a> | <a href="#">pyrolysyl-tRNA synthetase</a>                                                              | <a href="#">Pyrrolysyl-tRNA synthetase (pylS) (EC 6.1.1.-)</a>                                                                                            | CL1 | Yes | no change     | COG0072J, COG2024J |
| MA0169 | 450 | <a href="#">20089067</a>  | <a href="#">class H tetracycline resistance efflux protein</a>                                         | <a href="#">major facilitator superfamily transporter, large fragment ; major facilitator superfamily transporter, small fragment</a>                     | CL4 | nd  | more specific | COG0477GEPR        |
| MA0171 | 492 | <a href="#">20089069</a>  | <a href="#">phenylalanyl-tRNA synthetase subunit alpha (pheS)</a>                                      | <a href="#">Phenylalanyl-tRNA synthetase, alpha subunit (EC 6.1.1.20)</a>                                                                                 | CL2 | nd  | no change     | COG0016J           |
| MA0172 | 437 | <a href="#">20089070</a>  | <a href="#">tryptophanyl-tRNA synthetase (trpS)</a>                                                    | <a href="#">Tryptophanyl-tRNA synthetase (EC 6.1.1.2)</a>                                                                                                 | CL3 | Yes | no change     | COG0180J           |
| MA0182 | 202 | <a href="#">20089080</a>  | <a href="#">translation initiation factor IF-2 subunit beta (eif5)</a>                                 | <a href="#">translation initiation factor a/eIF-2 beta subunit</a>                                                                                        | CL2 | Yes | no change     | COG1601J, COG3269R |
| MA0183 | 173 | <a href="#">20089081</a>  | <a href="#">50S ribosomal protein L10e</a>                                                             | <a href="#">LSU ribosomal protein L10AE (rpl10e)</a>                                                                                                      | CL2 | Yes | no change     | COG0197J           |
| MA0194 | 925 | <a href="#">20089092</a>  | <a href="#">alanyl-tRNA synthetase</a>                                                                 | <a href="#">Alanyl-tRNA synthetase (alaS) (EC 6.1.1.7)</a>                                                                                                | CL3 | Yes | no change     | COG0013J           |
| MA0201 | 375 | <a href="#">20089099</a>  | <a href="#">3-isopropylmalate dehydrogenase (leuB)</a>                                                 | <a href="#">Tartrate dehydrogenase/decarboxylase (EC 1.1.1.93) (EC 4.1.1.73) (EC 1.1.1.83)</a>                                                            | CL2 | Yes | more specific | COG0473CE          |
| MA0202 | 162 | <a href="#">20089100</a>  | <a href="#">3-isopropylmalate dehydratase small subunit (leuD)</a>                                     | <a href="#">3-Isopropylmalate dehydratase small subunit (3-isopropylmalate isomerase small subunit) and homoacnitase small subunit - dual specificity</a> | CL2 | Yes | more specific | COG0066E           |
| MA0206 | 368 | <a href="#">20089104</a>  | <a href="#">5-aminoimidazole-4-carboxamide-1-beta-D-ribofuranosyl 5'-monophosphate--formate ligase</a> | <a href="#">5-formaminoimidazole-4-carboxamide-1-(beta)-D-ribofuranosyl 5'-monophosphate synthetase (purP) (EC 6.3.4.-)</a>                               | CL2 | Yes | no change     | COG1759R           |
| MA0216 | 398 | <a href="#">20089114</a>  | <a href="#">S-adenosylmethionine synthetase (mat)</a>                                                  | <a href="#">Archaeal S-adenosylmethionine synthetase (EC 2.5.1.6) (Methionine adenosyltransferase) (AdoMet synthetase)</a>                                | CL2 | Yes | no change     | COG1812E           |

|        |     |                           |                                                                                |                                                                                                                                        |     |     |               |           |
|--------|-----|---------------------------|--------------------------------------------------------------------------------|----------------------------------------------------------------------------------------------------------------------------------------|-----|-----|---------------|-----------|
| MA0217 | 289 | <a href="#">20089115</a>  | <a href="#">ATP_phosphoribosyltransferase (hisG)</a>                           | <a href="#">ATP phosphoribosyltransferase (hisG) (EC 2.4.2.17)</a>                                                                     | CL3 | Yes | no change     | COG0040E  |
| MA0218 | 245 | <a href="#">20089116</a>  | <a href="#">1-(5-phosphoribosyl)-5-imidazoleglycerol-phosphate dehydratase</a> | <a href="#">1-(5-phosphoribosyl)-5-((5-phosphoribosylamino)methylideneamino)imidazole-4-carboxamide isomerase (hisA) (EC 5.3.1.16)</a> | CL2 | Yes | no change     | COG0106E  |
| MA0219 | 191 | <a href="#">20089117</a>  | <a href="#">imidazoleglycerol-phosphate dehydratase</a>                        | <a href="#">Imidazoleglycerol-phosphate dehydratase (hisB) (EC 4.2.1.19)</a>                                                           | CL2 | Yes | no change     | COG0131E  |
| MA0241 | 448 | <a href="#">20089139</a>  | <a href="#">phosphomannomutase</a>                                             | <a href="#">Phosphoglucomutase/Phosphomannomutase</a>                                                                                  | CL2 | Yes | more specific | COG1109G  |
| MA0245 | 401 | <a href="#">20089143</a>  | <a href="#">hypothetical protein MA0245</a>                                    | <a href="#">protein of unknown function DUF521</a>                                                                                     | CL4 | nd  | more specific | COG1679S  |
| MA0246 | 422 | <a href="#">20089144</a>  | <a href="#">4-hydroxybenzoate decarboxylase</a>                                | <a href="#">3-octaprenyl-4-hydroxybenzoate carboxy-lyase (ubiD) (EC 4.1.1.-)</a>                                                       | CL3 | Yes | more specific | COG0043H  |
| MA0258 | 370 | <a href="#">20089156</a>  | <a href="#">transposase</a>                                                    | <a href="#">transposase</a>                                                                                                            | CL4 | Yes | no change     | COG0675L  |
| MA0261 | 415 | <a href="#">161484942</a> | <a href="#">thiamine biosynthesis protein ThiC</a>                             | <a href="#">Thiamine biosynthesis protein thiC (thiC)</a>                                                                              | CL2 | nd  | no change     | COG0422H  |
| MA0266 | 500 | <a href="#">20089164</a>  | <a href="#">hypothetical protein MA0266</a>                                    | <a href="#">UPF0027-domain protein</a>                                                                                                 | CL4 | nd  | more specific | COG1690S  |
| MA0269 | 316 | <a href="#">20089167</a>  | <a href="#">tetrahydromethanopterin S-methyltransferase subunit H (mtrH)</a>   | <a href="#">Tetrahydromethanopterin S-methyltransferase subunit H (mtrH) (EC 2.1.1.86)</a>                                             | CL2 | Yes | no change     | COG1962H  |
| MA0270 | 73  | <a href="#">20089168</a>  | <a href="#">tetrahydromethanopterin S-methyltransferase subunit G (mtrG)</a>   | <a href="#">Tetrahydromethanopterin S-methyltransferase subunit G (EC 2.1.1.86)</a>                                                    | CL2 | Yes | no change     | COG4064H  |
| MA0271 | 74  | <a href="#">20089169</a>  | <a href="#">tetrahydromethanopterin S-methyltransferase subunit F (mtrF)</a>   | <a href="#">Tetrahydromethanopterin S-methyltransferase subunit F (EC 2.1.1.86)</a>                                                    | CL2 | nd  | no change     | COG4218H  |
| MA0272 | 240 | <a href="#">20089170</a>  | <a href="#">tetrahydromethanopterin S-methyltransferase subunit A (mtrA)</a>   | <a href="#">Tetrahydromethanopterin S-methyltransferase subunit A (mtrA) (EC 2.1.1.86)</a>                                             | CL2 | Yes | no change     | COG4063H  |
| MA0274 | 267 | <a href="#">20089172</a>  | <a href="#">tetrahydromethanopterin S-methyltransferase subunit C (mtrC)</a>   | <a href="#">Tetrahydromethanopterin S-methyltransferase subunit C (mtrC) (EC 2.1.1.86)</a>                                             | CL2 | Yes | no change     | COG4061H  |
| MA0275 | 249 | <a href="#">20089173</a>  | <a href="#">tetrahydromethanopterin S-methyltransferase subunit D (mtrD)</a>   | <a href="#">Tetrahydromethanopterin S-methyltransferase subunit D (mtrD) (EC 2.1.1.86)</a>                                             | CL2 | Yes | no change     | COG4060H  |
| MA0276 | 304 | <a href="#">20089174</a>  | <a href="#">tetrahydromethanopterin S-methyltransferase subunit E (mtrE)</a>   | <a href="#">Tetrahydromethanopterin S-methyltransferase subunit E (mtrE) (EC 2.1.1.86)</a>                                             | CL2 | Yes | no change     | COG4059H  |
| MA0279 | 639 | <a href="#">20089177</a>  | <a href="#">sodium:proline symporter (proline permease) (purP)</a>             | <a href="#">sodium/solute symporter</a>                                                                                                | CL3 | Yes | less specific | COG0591ER |

|        |      |                           |                                                                                          |                                                                                            |     |      |               |                    |
|--------|------|---------------------------|------------------------------------------------------------------------------------------|--------------------------------------------------------------------------------------------|-----|------|---------------|--------------------|
| MA0306 | 584  | <a href="#">20089204</a>  | <a href="#">formylmethanofuran dehydrogenase, subunit A</a>                              | <a href="#">Molybdenum formylmethanofuran dehydrogenase subunit A (fmdA) (EC 1.2.99.5)</a> | CL2 | Yes  | no change     | COG1229C           |
| MA0308 | 129  | <a href="#">20089206</a>  | <a href="#">formylmethanofuran dehydrogenase, subunit D</a>                              | <a href="#">Molybdenum formylmethanofuran dehydrogenase subunit D (fmdD) (EC 1.2.99.5)</a> | CL2 | Yes  | no change     | COG1153C           |
| MA0309 | 433  | <a href="#">20089207</a>  | <a href="#">formylmethanofuran dehydrogenase, subunit B</a>                              | <a href="#">Molybdenum formylmethanofuran dehydrogenase subunit B (fmdB) (EC 1.2.99.5)</a> | CL2 | Yes  | no change     | COG1029C           |
| MA0311 | 256  | <a href="#">20089209</a>  | <a href="#">outer membrane protein</a>                                                   | <a href="#">Protein of unknown function DUF541</a>                                         | CL4 | nd   | more specific | COG2968S           |
| MA0345 | 131  | <a href="#">20089243</a>  | <a href="#">hypothetical protein MA0345</a>                                              | <a href="#">hypothetical protein</a>                                                       | CL5 | nd   | no change     | COG4744S           |
| MA0385 | 1478 | <a href="#">161484941</a> | <a href="#">cobaltochelataase (cobN)</a>                                                 | <a href="#">magnesium/cobalt chelatase-domain containing protein</a>                       | CL4 | Yes  | more specific | COG1429H           |
| MA0431 | 60   | <a href="#">20089323</a>  | <a href="#">ferredoxin</a>                                                               | <a href="#">4Fe-4S ferredoxin, iron-sulfur protein</a>                                     | CL2 | nd   | more specific | COG1145C           |
| MA0439 | 267  | <a href="#">20089331</a>  | <a href="#">fructose-bisphosphate aldolase</a>                                           | <a href="#">2-amino-3,7-dideoxy-D-threo-hept-6-ulosonate synthase CL2</a>                  | CL2 | Yes  | more specific | COG1830G           |
| MA0440 | 171  | <a href="#">20089332</a>  | <a href="#">deoxyuridine 5'-triphosphate nucleotidohydrolase</a>                         | <a href="#">Deoxyuridine 5'-triphosphate nucleotidohydrolase (dUTPase) (EC 3.6.1.23)</a>   | CL2 | Yes  | no change     | COG0717F           |
| MA0455 | 461  | <a href="#">20089346</a>  | <a href="#">methanol-5-hydroxybenzimidazolylcobamide co-methyltransferase, isozyme 1</a> | <a href="#">methanol corrinoid protein (mtaB)</a>                                          | CL1 | Yes  | no change     | -                  |
| MA0456 | 258  | <a href="#">20089347</a>  | <a href="#">methanol-5-hydroxybenzimidazolylcobamide co-methyltransferase, isozyme 1</a> | <a href="#">methanol corrinoid protein (mtaC)</a>                                          | CL1 | Yes* | less specific | COG5012R           |
| MA0488 | 923  | <a href="#">20089377</a>  | <a href="#">cell surface protein</a>                                                     | <a href="#">Hypothetical protein</a>                                                       | CL5 | nd   | less specific | COG0823U, COG3291R |
| MA0490 | 848  | <a href="#">20089379</a>  | <a href="#">sensory transduction histidine kinase</a>                                    | <a href="#">Multisensor signal transduction histidine kinase</a>                           | CL4 | Yes  | more specific | COG2202T, COG3920T |
| MA0493 | 216  | <a href="#">20089382</a>  | <a href="#">hypothetical protein MA0493</a>                                              | <a href="#">pyridoxal 5'-phosphate-dependent-protein, UPF0001family</a>                    | CL4 | nd   | more specific | COG0325R           |
| MA0507 | 172  | <a href="#">20089396</a>  | <a href="#">antibiotic resistance protein McbG</a>                                       | <a href="#">Protein with pentapeptide repeats</a>                                          | CL4 | nd   | less specific | COG1357S           |
| MA0509 | 482  | <a href="#">20089398</a>  | <a href="#">surface antigen gene</a>                                                     | <a href="#">NHL repeat domain (Beta propeller clan) protein</a>                            | CL4 | nd   | more specific | COG3391S           |
| MA0511 | 204  | <a href="#">20089400</a>  | <a href="#">hypothetical protein MA0511</a>                                              | <a href="#">protein of unknown function with UPF0228 domain</a>                            | CL4 | nd   | more specific | -                  |
| MA0523 | 900  | <a href="#">20089412</a>  | <a href="#">DNA mismatch repair protein (mutS)</a>                                       |                                                                                            | CL2 | Yes  | no change     | COG0249L           |
| MA0527 | 213  | <a href="#">20089416</a>  | <a href="#">dimethylamine corrinoid protein</a>                                          | <a href="#">dimethylamine corrinoid protein (mtbC)</a>                                     | CL2 | nd   | no change     | COG5012R           |

|        |      |                           |                                                                    |                                                                                                                      |     |     |               |                    |
|--------|------|---------------------------|--------------------------------------------------------------------|----------------------------------------------------------------------------------------------------------------------|-----|-----|---------------|--------------------|
| MA0528 | 495  | <a href="#">20089417</a>  | <a href="#">trimethylamine methyltransferase</a>                   | <a href="#">Trimethylamine methyltransferase (mttB) (EC 2.1.1.-)</a>                                                 | CL2 | Yes | no change     | COG5598H           |
| MA0529 | 216  | <a href="#">20089418</a>  | <a href="#">trimethylamine corrinoid protein</a>                   | <a href="#">trimethylamine corrinoid protein</a>                                                                     | CL2 | Yes | no change     | COG5012R           |
| MA0530 | 353  | <a href="#">20089419</a>  | <a href="#">transmembrane protein MttP</a>                         | <a href="#">DUF6-domain membrane protein</a>                                                                         | CL4 | nd  | more specific | COG0697GER         |
| MA0531 | 101  | <a href="#">20089420</a>  | <a href="#">hypothetical protein MA0531</a>                        | <a href="#">hypothetical protein</a>                                                                                 | CL5 | nd  | no change     | -                  |
| MA0534 | 533  | <a href="#">20089423</a>  | <a href="#">lysyl-tRNA synthetase (lysK)</a>                       | <a href="#">Lysyl-tRNA synthetase (EC 6.1.1.6)</a>                                                                   | CL2 | Yes | no change     | COG1384J           |
| MA0540 | 95   | <a href="#">20089429</a>  | <a href="#">hypothetical protein MA0540</a>                        | <a href="#">Protein with MazG nucleotide pyrophosphohydrolase domain</a>                                             | CL4 | Yes | more specific | COG1694R           |
| MA0541 | 273  | <a href="#">20089430</a>  | <a href="#">imidazole glycerol phosphate synthase subunit HisF</a> | <a href="#">Imidazoleglycerol-phosphate synthase subunit hisF (cyclase subunit) (EC 4.1.3.-)</a>                     | CL2 | Yes | no change     | COG0107E           |
| MA0550 | 365  | <a href="#">20089439</a>  | <a href="#">chorismate synthase (aroC)</a>                         | <a href="#">Chorismate synthase (aroC) (EC 4.2.3.5)</a>                                                              | CL2 | Yes | no change     | COG0082E           |
| MA0551 | 1349 | <a href="#">20089440</a>  | <a href="#">sensory transduction histidine kinase</a>              | <a href="#">Multisensor signal transduction histidine kinase</a>                                                     | CL4 | nd  | more specific | COG2202T, COG3920T |
| MA0558 | 748  | <a href="#">20089447</a>  | <a href="#">hypothetical protein MA0558</a>                        | <a href="#">Hypothetical protein</a>                                                                                 | CL5 | nd  | no change     | -                  |
| MA0561 | 791  | <a href="#">20089450</a>  | <a href="#">hypothetical protein MA0561</a>                        | <a href="#">Hypothetical protein</a>                                                                                 | CL5 | Yes | no change     | -                  |
| MA0563 | 399  | <a href="#">20089452</a>  | <a href="#">hypothetical protein MA0563</a>                        | <a href="#">Hypothetical protein</a>                                                                                 | CL5 | Yes | no change     | COG2834M           |
| MA0564 | 423  | <a href="#">20089453</a>  | <a href="#">hypothetical protein MA0564</a>                        | <a href="#">Hypothetical protein</a>                                                                                 | CL5 | nd  | no change     | -                  |
| MA0565 | 221  | <a href="#">20089454</a>  | <a href="#">hypothetical protein MA0565</a>                        | <a href="#">Hypothetical protein</a>                                                                                 | CL5 | nd  | no change     | -                  |
| MA0566 | 318  | <a href="#">20089455</a>  | <a href="#">hypothetical protein MA0566</a>                        | <a href="#">Hypothetical protein</a>                                                                                 | CL5 | nd  | no change     | -                  |
| MA0573 | 349  | <a href="#">20089462</a>  | <a href="#">heme d1 biosynthesis protein NirJ</a>                  | <a href="#">Radical SAM family protein</a>                                                                           | CL4 | Yes | more specific | COG0535R           |
| MA0575 | 158  | <a href="#">20089464</a>  | <a href="#">heme d1 biosynthesis protein NirH</a>                  | <a href="#">Transcriptional regulator</a>                                                                            | CL4 | nd  | less specific | COG1522K           |
| MA0578 | 324  | <a href="#">20089467</a>  | <a href="#">delta-aminolevulinic acid dehydratase</a>              | <a href="#">Delta-aminolevulinic acid dehydratase (Porphobilinogen synthase) (ALAD) (ALADH) (hemB) (EC 4.2.1.24)</a> | CL2 | Yes | no change     | COG0113H           |
| MA0581 | 424  | <a href="#">20089470</a>  | <a href="#">glutamate-1-semialdehyde aminotransferase</a>          | <a href="#">Glutamate-1-semialdehyde 2.1-aminomutase (hemL) (EC 5.4.3.8)</a>                                         | CL2 | Yes | no change     | COG0001H           |
| MA0583 | 311  | <a href="#">20089472</a>  | <a href="#">dihydroorotate dehydrogenase 1B</a>                    | <a href="#">Dihydroorotate dehydrogenase, catalytic subunit (Dihydroorotate oxidase) (pyrD) (EC 1.3.3.1)</a>         | CL2 | Yes | more specific | COG0167F           |
| MA0587 | 579  | <a href="#">20089476</a>  | <a href="#">glutamyl-tRNA synthetase (gltX)</a>                    | <a href="#">Glutamyl-tRNA synthetase (EC 6.1.1.17)</a>                                                               | CL3 | Yes | no change     | COG0008J           |
| MA0592 | 523  | <a href="#">20089481</a>  | <a href="#">D-3-phosphoglycerate dehydrogenase</a>                 | <a href="#">D-3-phosphoglycerate dehydrogenase (serA) (PGDH) (EC 1.1.1.95)</a>                                       | CL2 | Yes | no change     | COG0111HE          |
| MA0595 | 138  | <a href="#">20089484</a>  | <a href="#">50S ribosomal protein L18e</a>                         | <a href="#">LSU ribosomal protein L18E (rpl18e)</a>                                                                  | CL2 | Yes | no change     | COG1727J           |
| MA0596 | 140  | <a href="#">161484940</a> | <a href="#">50S ribosomal protein L13P</a>                         | <a href="#">LSU ribosomal protein L13P (rpl13p)</a>                                                                  | CL2 | Yes | no change     | COG0102J           |



|        |     |                          |                                                                                   |                                                                                                                                                                                                                                    |     |      |               |                    |
|--------|-----|--------------------------|-----------------------------------------------------------------------------------|------------------------------------------------------------------------------------------------------------------------------------------------------------------------------------------------------------------------------------|-----|------|---------------|--------------------|
| MA0597 | 134 | <a href="#">20089486</a> | <a href="#">30S ribosomal protein S9P</a>                                         | <a href="#">SSU ribosomal protein S9P (rps9p)</a>                                                                                                                                                                                  | CL2 | Yes  | no change     | COG0103J           |
| MA0598 | 62  | <a href="#">20089487</a> | <a href="#">DNA-directed RNA polymerase subunit N (rpoN)</a>                      | <a href="#">DNA-directed RNA polymerase subunit N</a>                                                                                                                                                                              | CL2 | nd   | no change     | COG1644K           |
| MA0600 | 247 | <a href="#">20089489</a> | <a href="#">30S ribosomal protein S2</a>                                          | <a href="#">SSU ribosomal protein S2P (rps2p)</a>                                                                                                                                                                                  | CL2 | Yes  | no change     | COG0052J           |
| MA0604 | 365 | <a href="#">20089493</a> | <a href="#">isopentenyl pyrophosphate isomerase</a>                               | <a href="#">Isopentenyl-diphosphate delta-isomerase (EC 5.3.3.2)</a>                                                                                                                                                               | CL2 | Yes  | more specific | COG1304C           |
| MA0605 | 447 | <a href="#">20089494</a> | <a href="#">metallo-beta-lactamase</a>                                            | <a href="#">UPF0036 protein, beta-lactamase-like</a>                                                                                                                                                                               | CL4 | Yes* | less specific | COG0595R           |
| MA0606 | 324 | <a href="#">20089495</a> | <a href="#">bifunctional short chain isoprenyl diphosphate synthase</a>           | <a href="#">Bifunctional short chain isoprenyl diphosphate synthase (Includes: Farnesyl pyrophosphate synthetase (EC 2.5.1.1) (FPP synthetase); (Dimethylallyl)transtransferase); Geranyltranstransferase (EC 2.5.1.10) (idsA)</a> | CL2 | Yes  | no change     | COG0142H           |
| MA0608 | 883 | <a href="#">20089497</a> | <a href="#">pyruvate phosphate dikinase (ppdk)</a>                                | <a href="#">Pyruvate phosphate dikinase EC 2.7.9.1</a>                                                                                                                                                                             | CL2 | Yes  | no change     | COG0574G           |
| MA0610 | 337 | <a href="#">20089499</a> | <a href="#">transcription initiation factor IIB</a>                               | <a href="#">Transcription initiation factor IIB (TFIIB)</a>                                                                                                                                                                        | CL2 | nd   | no change     | COG1405K           |
| MA0619 | 654 | <a href="#">20089507</a> | <a href="#">sensory transduction histidine kinase</a>                             | <a href="#">Multisensor signal transduction histidine kinase</a>                                                                                                                                                                   | CL4 | Yes  | more specific | COG2202T, COG3920T |
| MA0639 | 163 | <a href="#">20089526</a> | <a href="#">rubrerythrin</a>                                                      | <a href="#">Rubrerythrin</a>                                                                                                                                                                                                       | CL2 | Yes  | no change     | COG1592C           |
| MA0641 | 467 | <a href="#">20089528</a> | <a href="#">hypothetical protein MA0641</a>                                       | <a href="#">protein with PHP (polymerase and histidinol phosphatase) C-terminal domain</a>                                                                                                                                         | CL4 | nd   | more specific | COG1379S           |
| MA0644 | 271 | <a href="#">20089531</a> | <a href="#">translation initiation factor IF-2 subunit alpha</a>                  | <a href="#">translation initiation factor IF-2 subunit alpha</a>                                                                                                                                                                   | CL2 | Yes  | no change     | COG1093J           |
| MA0645 | 62  | <a href="#">20089532</a> | <a href="#">30S ribosomal protein S27e</a>                                        | <a href="#">SSU ribosomal protein S27E (rps27e)</a>                                                                                                                                                                                | CL2 | Yes  | no change     | COG2051J           |
| MA0646 | 92  | <a href="#">20089533</a> | <a href="#">50S ribosomal protein L44e</a>                                        | <a href="#">LSU ribosomal protein L44E (rpl44e)</a>                                                                                                                                                                                | CL2 | Yes  | no change     | COG1631J           |
| MA0648 | 414 | <a href="#">20089535</a> | <a href="#">DNA primase small subunit</a>                                         | <a href="#">DNA primase, small subunit</a>                                                                                                                                                                                         | CL3 | Yes  | no change     | COG1467L           |
| MA0651 | 788 | <a href="#">20089538</a> | <a href="#">hypothetical protein MA0651</a>                                       | <a href="#">FbpA, DUF814 containing protein</a>                                                                                                                                                                                    | CL4 | Yes  | more specific | COG1293K           |
| MA0663 | 199 | <a href="#">20089550</a> | <a href="#">Na+-transporting NADH:ubiquinone oxidoreductase, subunit 5 (nqr5)</a> | <a href="#">Electron transport complex protein nfa (Nitrogen fixation protein nfa)</a>                                                                                                                                             | CL2 | Yes  | more specific | COG4657C           |

|        |      |                          |                                                                       |                                                                                               |     |     |               |                              |
|--------|------|--------------------------|-----------------------------------------------------------------------|-----------------------------------------------------------------------------------------------|-----|-----|---------------|------------------------------|
| MA0664 | 264  | <a href="#">20089551</a> | <a href="#">ferredoxin (nqr6)</a>                                     | <a href="#">electron transport complex rnfB-like protein (Nitrogen fixation protein rnfB)</a> | CL2 | Yes | more specific | COG1145C, COG2878C           |
| MA0672 | 69   | <a href="#">20089557</a> | <a href="#">histone</a>                                               | <a href="#">archaeal histone A (hmaA)</a>                                                     | CL2 | nd  | more specific | COG2036B                     |
| MA0674 | 572  | <a href="#">20089559</a> | <a href="#">pyruvate carboxylase subunit B</a>                        | <a href="#">pyruvate carboxylase subunit B (EC 6.4.1.1) (pycB)</a>                            | CL2 | Yes | no change     | COG05111, COG1038C, COG5016C |
| MA0675 | 493  | <a href="#">20089560</a> | <a href="#">pyruvate carboxylase subunit A</a>                        | <a href="#">pyruvate carboxylase subunit A (EC 6.4.1.1) (pycA)</a>                            | CL2 | Yes | no change     | COG0439I                     |
| MA0681 | 701  | <a href="#">20089566</a> | <a href="#">Mcm2 DNA replication licensing factor</a>                 | <a href="#">MCM (minichromosome maintenance protein)</a>                                      | CL2 | Yes | no change     | COG1241L                     |
| MA0684 | 127  | <a href="#">20089569</a> | <a href="#">hypothetical protein MA0684 (fprB)</a>                    | <a href="#">Rubrerythrin-related protein</a>                                                  | CL4 | Yes | more specific | COG1592C                     |
| MA0685 | 228  | <a href="#">20089570</a> | <a href="#">sulfite reductase</a>                                     | <a href="#">Nitrite/sulphite reductase-related protein</a>                                    | CL4 | Yes | less specific | COG1251C                     |
| MA0688 | 409  | <a href="#">20089573</a> | <a href="#">heterodisulfide reductase, subunit D</a>                  | <a href="#">CoB-CoM heterodisulfide reductase, subunit D (EC 1.8.98.1) (hdrD)</a>             | CL2 | Yes | no change     | COG0247C                     |
| MA0689 | 211  | <a href="#">20089574</a> | <a href="#">hypothetical protein MA0689</a>                           | <a href="#">protein of unknown function DUF116</a>                                            | CL4 | Yes | more specific | COG1852S                     |
| MA0691 | 389  | <a href="#">20089576</a> | <a href="#">geranylgeranyl reductase</a>                              | <a href="#">thioredoxin reductase (NADPH)</a>                                                 | CL2 | nd  | more specific | COG0644C                     |
| MA0711 | 183  | <a href="#">20089596</a> | <a href="#">phenylacrylic acid decarboxylase</a>                      |                                                                                               | CL2 | Yes | no change     | COG0163H                     |
| MA0719 | 197  | <a href="#">20089604</a> | <a href="#">hypothetical protein MA0719</a>                           | <a href="#">RNA methyltransferase (EC 2.1.1.-)</a>                                            | CL2 | Yes | more specific | COG2263J                     |
| MA0722 | 386  | <a href="#">20089607</a> | <a href="#">Sep-tRNA:Cys-tRNA synthetase</a>                          | <a href="#">Sep-tRNA:Cys-tRNA synthase (EC 2.5.1.-)</a>                                       | CL3 | Yes | no change     | COG1103R                     |
| MA0726 | 420  | <a href="#">20089611</a> | <a href="#">diaminopimelate decarboxylase (lysA)</a>                  | <a href="#">Orn/DAP/Arg decarboxylase family / TabA-like</a>                                  | CL3 | Yes | less specific | COG0019E                     |
| MA0759 | 1281 | <a href="#">20089644</a> | <a href="#">sensory transduction histidine kinase</a>                 | <a href="#">Hypothetical protein</a>                                                          | CL5 | nd  | less specific | COG2202T, COG3920T           |
| MA0762 | 955  | <a href="#">20089647</a> | <a href="#">ATP-dependent DNA helicase</a>                            | <a href="#">DEAD/DEAH box helicase-like protein</a>                                           | CL3 | nd  | less specific | COG1201R                     |
| MA0788 | 156  | <a href="#">20089672</a> | <a href="#">glutamine ABC transporter, ATP-binding protein (glnQ)</a> | <a href="#">Phosphate import ABC transporter ATPase subunit (EC 3.6.3.27)</a>                 | CL2 | nd  | more specific | COG1126E                     |
| MA0807 | 220  | <a href="#">20089691</a> | <a href="#">NifU family protein</a>                                   | <a href="#">Nitrogen-fixing NifU-like protein</a>                                             | CL4 | nd  | less specific | COG0822C                     |
| MA0808 | 384  | <a href="#">20089692</a> | <a href="#">homocysteine desulfhydrase</a>                            | <a href="#">Cysteine desulfurase</a>                                                          | CL2 | Yes | more specific | COG1104E                     |
| MA0809 | 139  | <a href="#">20089693</a> | <a href="#">hypothetical protein MA0809</a>                           | <a href="#">Hypothetical protein</a>                                                          | CL5 | Yes | no change     | COG2210S                     |
| MA0810 | 75   | <a href="#">20089694</a> | <a href="#">hypothetical protein MA0810</a>                           | <a href="#">response regulator SirA-like protein, UPF0033 family</a>                          | CL4 | nd  | more specific | COG0425O                     |
| MA0815 | 317  | <a href="#">20089699</a> | <a href="#">tyrosyl-tRNA synthetase (tyrS)</a>                        | <a href="#">Tyrosyl-tRNA synthetase (EC 6.1.1.1)</a>                                          | CL2 | Yes | no change     | COG0162J                     |



|        |      |                          |                                                                       |                                                                                                                       |     |     |                |                              |
|--------|------|--------------------------|-----------------------------------------------------------------------|-----------------------------------------------------------------------------------------------------------------------|-----|-----|----------------|------------------------------|
| MA0818 | 85   | <a href="#">20089702</a> | <a href="#">hypothetical protein MA0818</a>                           | <a href="#">Protein with PRC-barrel domain</a>                                                                        | CL4 | Yes | more specific  | COG1873S                     |
| MA0823 | 476  | <a href="#">20089707</a> | <a href="#">ss-DNA-specific exonuclease</a>                           | <a href="#">Single stranded DNA specific Exonuclease recJ</a>                                                         | CL3 | nd  | no change      | COG0608L                     |
| MA0825 | 172  | <a href="#">20089709</a> | <a href="#">hypothetical protein MA0825</a>                           | <a href="#">Protein of unknown function DUF1699</a>                                                                   | CL4 | nd  | more specific  | -                            |
| MA0826 | 547  | <a href="#">20089710</a> | <a href="#">histone acetyltransferase</a>                             | <a href="#">Elongator complex protein 3, elp3</a>                                                                     | CL2 | Yes | more specific  | COG1243KB                    |
| MA0829 | 671  |                          | hypothetical protein MA0829                                           | S-layer protein                                                                                                       | CL1 | Yes | more specific  |                              |
| MA0849 | 563  | <a href="#">20089733</a> | <a href="#">hypothetical protein MA0849</a>                           | <a href="#">putative methylamine methyltransferase corrinoid activation protein</a>                                   | CL4 | nd  | more specific  | COG1145C, COG3894R           |
| MA0850 | 2275 | <a href="#">20089734</a> | <a href="#">cell surface protein</a>                                  | <a href="#">magnesium/cobalt chelatase-domain containing protein</a>                                                  | CL4 | nd  | more specific  | COG1520S, COG3291R, COG3420P |
| MA0863 | 749  | <a href="#">20089747</a> | <a href="#">sensory transduction histidine kinase</a>                 | <a href="#">pleC (Non-motile and phage-resistance protein) -like multisensor signal transduction histidine kinase</a> | CL4 | nd  | no change      | COG0642T, COG2202T, COG2203T |
| MA0865 | 67   | <a href="#">20089749</a> | <a href="#">hypothetical protein MA0865</a>                           | <a href="#">Hypothetical protein</a>                                                                                  | CL5 | nd  | no change      | -                            |
| MA0887 | 317  | <a href="#">20089771</a> | <a href="#">phosphate ABC transporter, solute-binding protein</a>     | <a href="#">Phosphate import ABC transporter, phosphate binding protein (pstS)</a>                                    | CL3 | Yes | no change      | COG0226P                     |
| MA0888 | 296  | <a href="#">20089772</a> | <a href="#">phosphate ABC transporter, permease protein</a>           | <a href="#">Phosphate import ABC transporter permease protein (pstC)</a>                                              | CL3 | Yes | no change      | COG0573P                     |
| MA0889 | 307  | <a href="#">20089773</a> | <a href="#">phosphate ABC transporter, permease protein</a>           | <a href="#">Phosphate import ABC transporter permease protein (pstA)</a>                                              | CL3 | Yes | no change      | COG0581P                     |
| MA0890 | 258  | <a href="#">20089774</a> | <a href="#">phosphate ABC transporter, ATP-binding protein (pstB)</a> | <a href="#">CBS (Cystathionine-beta-synthase) and DUF293 domains-containing protein</a>                               | CL3 | Yes | less specific? | COG1117P                     |
| MA0895 | 111  | <a href="#">20089779</a> | <a href="#">translation initiation factor IF-1A</a>                   | <a href="#">translation initiation factor aIF-1A</a>                                                                  | CL2 | Yes | no change      | COG0361J                     |
| MA0902 | 113  | <a href="#">20089781</a> | <a href="#">nascent polypeptide-associated complex protein</a>        | <a href="#">Nascent polypeptide-associated complex (NAC), chaperone protein</a>                                       | CL2 | Yes | no change      | COG1308K                     |
| MA0908 | 120  | <a href="#">20089786</a> | <a href="#">phosphoribosyl-AMP cyclohydrolase</a>                     | <a href="#">Phosphoribosyl-AMP cyclohydrolase (hisI) (EC 3.5.4.19)</a>                                                | CL2 | nd  | no change      | COG0139E                     |
| MA0913 | 202  | <a href="#">20089791</a> | <a href="#">imidazole glycerol phosphate synthase subunit HisH</a>    | <a href="#">(EC 2.4.2.-)</a>                                                                                          | CL2 | Yes | no change      | COG0118E                     |
| MA0914 | 454  | <a href="#">20089792</a> | <a href="#">hypothetical protein MA0914</a>                           | <a href="#">AIR synthase related protein</a>                                                                          | CL4 | Yes | more specific  | COG1973O                     |
| MA0916 | 265  | <a href="#">20089794</a> | <a href="#">erythrocyte band 7 integral membrane protein</a>          | <a href="#">SPFH domain / Band 7 family integral membrane protein</a>                                                 | CL4 | Yes | less specific  | COG0330O                     |
| MA0923 | 125  | <a href="#">20089801</a> | <a href="#">30S ribosomal protein S8e</a>                             | <a href="#">SSU ribosomal protein S8E (rps8e)</a>                                                                     | CL2 | Yes | no change      | COG2007J                     |

|        |     |                          |                                                                         |                                                                                                     |     |     |               |                       |
|--------|-----|--------------------------|-------------------------------------------------------------------------|-----------------------------------------------------------------------------------------------------|-----|-----|---------------|-----------------------|
| MA0924 | 163 | <a href="#">20089802</a> | <a href="#">leucine responsive regulatory protein</a>                   | <a href="#">HTH transcriptional regulator, AsnC/Lrp family</a>                                      | CL3 | Yes | less specific | COG1522K              |
| MA0927 | 227 | <a href="#">20089805</a> | <a href="#">hypothetical protein MA0927</a>                             |                                                                                                     | CL5 | nd  | no change     | COG1549J              |
| MA0928 | 98  | <a href="#">20089806</a> | <a href="#">hypothetical protein MA0928</a>                             | <a href="#">hypothetical protein</a>                                                                | CL5 | nd  | no change     | -                     |
| MA0929 | 281 | <a href="#">20089807</a> | <a href="#">transmembrane protein MttP</a>                              | <a href="#">DUF6-domain membrane protein</a>                                                        | CL4 | nd  | more specific | COG0697GER            |
| MA0930 | 70  | <a href="#">20089808</a> | <a href="#">transmembrane protein MttP</a>                              | <a href="#">DUF6-domain membrane protein</a>                                                        | CL4 | nd  | more specific | -                     |
| MA0931 | 217 | <a href="#">20089809</a> | <a href="#">trimethylamine corrinoid protein</a>                        | <a href="#">trimethylamine corrinoid protein</a>                                                    | CL2 | nd  | no change     | COG5012R              |
| MA0932 | 495 | <a href="#">20089810</a> | <a href="#">trimethylamine methyltransferase</a>                        | <a href="#">Trimethylamine methyltransferase (mttB) (EC 2.1.1.-)</a>                                | CL2 | nd  | no change     | COG5598H              |
| MA0934 | 218 | <a href="#">20089812</a> | <a href="#">dimethylamine corrinoid protein</a>                         | <a href="#">dimethylamine corrinoid protein (mtbC)</a>                                              | CL2 | nd  | no change     | COG5012R              |
| MA0937 | 235 | <a href="#">20089815</a> | <a href="#">ABC transporter, ATP-binding protein</a>                    | <a href="#">atypical ABC-ATPase SufC</a>                                                            | CL3 | Yes | no change     | COG0396O              |
| MA0940 | 183 | <a href="#">20089818</a> | <a href="#">hypothetical protein MA0940</a>                             | <a href="#">alpha-ribazole-phosphate phosphatase (cobZ) (EC 3.1.3.73)</a>                           | CL2 | Yes | more specific | COG1267I              |
| MA0949 | 152 | <a href="#">20089827</a> | <a href="#">30S ribosomal protein S15P</a>                              | <a href="#">SSU ribosomal protein S15P (rps15p)</a>                                                 | CL2 | Yes | no change     | COG0184J              |
| MA0951 | 356 | <a href="#">20089829</a> | <a href="#">hemin permease (hemU)</a>                                   | <a href="#">Iron complex/Vitamin B12 ABC transporter permease protein</a>                           | CL3 | Yes | more specific | COG0609P              |
| MA0953 | 407 | <a href="#">20089831</a> | <a href="#">cell division protein FtsZ</a>                              | <a href="#">Tubulin/FtsZ family protein</a>                                                         | CL4 | nd  | less specific | COG0206D              |
| MA0954 | 422 | <a href="#">20089832</a> | <a href="#">hypothetical protein MA0954</a>                             | <a href="#">protein of unknown function DUF11</a>                                                   | CL4 | nd  | more specific | COG1361M,<br>COG2373R |
| MA0963 | 247 | <a href="#">20089841</a> | <a href="#">hypothetical protein MA0963</a>                             | <a href="#">Protein of unknown function UPF0278</a>                                                 | CL4 | Yes | more specific | COG1458R              |
| MA0969 | 243 | <a href="#">20089846</a> | <a href="#">orotidine-5-phosphate decarboxylase</a>                     | <a href="#">Orotidine 5'-phosphate decarboxylase (OMP decarboxylase) (PyrF) (EC 4.1.1.23)</a>       | CL2 | nd  | no change     | COG0284F              |
| MA0984 | 383 | <a href="#">20089861</a> | <a href="#">hypothetical protein MA0984</a>                             | <a href="#">hypothetical protein</a>                                                                | CL5 | nd  | no change     | COG3385L              |
| MA1009 | 370 | <a href="#">20089885</a> | <a href="#">transposase</a>                                             | <a href="#">transposase</a>                                                                         | CL4 | Yes | no change     | COG0675L              |
| MA1011 | 468 | <a href="#">20089886</a> | <a href="#">acetyl-CoA decarboxylase/synthase complex subunit gamma</a> | <a href="#">Acetyl-CoA decarboxylase/synthase complex gamma subunit (EC 2.1.1.-)</a>                | CL2 | Yes | no change     | COG1456C              |
| MA1012 | 436 | <a href="#">20089887</a> | <a href="#">acetyl-CoA decarboxylase/synthase complex subunit delta</a> | <a href="#">Acetyl-CoA decarboxylase/synthase complex delta subunit</a>                             | CL2 | Yes | no change     | COG2069C              |
| MA1013 | 232 | <a href="#">20089888</a> | <a href="#">carbon-monoxide dehydrogenase accessory protein</a>         | <a href="#">carbon monoxide dehydrogenase/acetyl-CoA synthase complex, nickel-inserting subunit</a> | CL3 | Yes | no change     | COG3640D              |

|        |     |                          |                                                                         |                                                                                                                                                         |     |     |               |          |
|--------|-----|--------------------------|-------------------------------------------------------------------------|---------------------------------------------------------------------------------------------------------------------------------------------------------|-----|-----|---------------|----------|
| MA1014 | 469 | <a href="#">20089889</a> | <a href="#">acetyl-CoA decarboxylase/synthase complex subunit beta</a>  | <a href="#">Acetyl-CoA decarboxylase/synthase complex beta subunit (EC 2.3.1.-)</a>                                                                     | CL2 | Yes | no change     | COG1614C |
| MA1016 | 806 | <a href="#">20089891</a> | <a href="#">acetyl-CoA decarboxylase/synthase complex subunit alpha</a> | <a href="#">Acetyl-CoA decarboxylase/synthase complex alpha subunit 2 (EC 1.2.99.2)</a>                                                                 | CL2 | Yes | no change     | COG1152C |
| MA1018 | 335 | <a href="#">20089893</a> | <a href="#">glyceraldehyde-3-phosphate dehydrogenase</a>                | <a href="#">glyceraldehyde-3-phosphate dehydrogenase</a>                                                                                                | CL2 | Yes | no change     | COG0057G |
| MA1022 | 605 | <a href="#">20089897</a> | <a href="#">indolepyruvate ferredoxin oxidoreductase, subunit alpha</a> | <a href="#">Protein containing N-terminal Pyruvate flavodoxin/ferredoxin oxidoreductase region, C-terminal TPP-binding region and ferredoxin domain</a> | CL4 | nd  | less specific | COG4231C |
| MA1041 | 73  | <a href="#">20089913</a> | <a href="#">hypothetical protein MA1041</a>                             | <a href="#">cobalt ABC transporter ATP-binding protein <i>cbiO</i></a>                                                                                  | CL3 | nd  | more specific | COG0675L |
| MA1072 | 337 | <a href="#">20089942</a> | <a href="#">50S ribosomal protein L3P</a>                               | <a href="#">LSU ribosomal protein L3P (<i>rpl3p</i>)</a>                                                                                                | CL2 | Yes | no change     | COG0087J |
| MA1073 | 253 | <a href="#">20089943</a> | <a href="#">50S ribosomal protein L4P</a>                               | <a href="#">LSU ribosomal protein L4P (<i>rpl4p</i>)</a>                                                                                                | CL2 | Yes | no change     | COG0088J |
| MA1074 | 82  | <a href="#">20089944</a> | <a href="#">50S ribosomal protein L23</a>                               | <a href="#">LSU ribosomal protein L23P (<i>rpl23p</i>)</a>                                                                                              | CL2 | Yes | no change     | COG0089J |
| MA1075 | 238 | <a href="#">20089945</a> | <a href="#">50S ribosomal protein L2P</a>                               | <a href="#">LSU ribosomal protein L2P (<i>rpl2p</i>)</a>                                                                                                | CL2 | Yes | no change     | COG0090J |
| MA1076 | 136 | <a href="#">20089946</a> | <a href="#">30S ribosomal protein S19P</a>                              | <a href="#">SSU ribosomal protein S19P (<i>rps19p</i>)</a>                                                                                              | CL2 | Yes | no change     | COG0185J |
| MA1077 | 151 | <a href="#">20089947</a> | <a href="#">50S ribosomal protein L22P</a>                              | <a href="#">LSU ribosomal protein L22P (<i>rpl22p</i>)</a>                                                                                              | CL2 | Yes | no change     | COG0091J |
| MA1079 | 67  | <a href="#">20089949</a> | <a href="#">50S ribosomal protein L29</a>                               | <a href="#">LSU ribosomal protein L29P (<i>rpl29p</i>)</a>                                                                                              | CL2 | Yes | no change     | COG0255J |
| MA1080 | 110 | <a href="#">20089950</a> | <a href="#">ribonuclease P protein component 1</a>                      | <a href="#">Ribonuclease P protein component 1 (<i>mp1</i>) (EC 3.1.26.5)</a>                                                                           | CL2 | Yes | no change     | COG1588J |
| MA1081 | 109 | <a href="#">20089951</a> | <a href="#">30S ribosomal protein S17P</a>                              | <a href="#">SSU ribosomal protein S17P (<i>rps17p</i>)</a>                                                                                              | CL2 | Yes | no change     | COG0186J |
| MA1082 | 132 | <a href="#">20089952</a> | <a href="#">50S ribosomal protein L14P</a>                              | <a href="#">LSU ribosomal protein L14P (<i>rpl14p</i>)</a>                                                                                              | CL2 | Yes | no change     | COG0093J |
| MA1085 | 165 | <a href="#">20089955</a> | <a href="#">50S ribosomal protein L5P</a>                               | <a href="#">LSU ribosomal protein L5P (<i>rpl5p</i>)</a>                                                                                                | CL2 | Yes | no change     | COG0094J |
| MA1086 | 50  | <a href="#">20089956</a> | <a href="#">30S ribosomal protein S14P</a>                              | <a href="#">SSU ribosomal protein S14P (<i>rps14p</i>)</a>                                                                                              | CL2 | nd  | no change     | COG0199J |
| MA1087 | 130 | <a href="#">20089957</a> | <a href="#">30S ribosomal protein S8P</a>                               | <a href="#">SSU ribosomal protein S8P (<i>rps8p</i>)</a>                                                                                                | CL2 | Yes | no change     | COG0096J |
| MA1089 | 161 | <a href="#">20089959</a> | <a href="#">50S ribosomal protein L32e</a>                              | <a href="#">LSU ribosomal protein L32E (<i>rpl32e</i>)</a>                                                                                              | CL2 | Yes | no change     | COG1717J |
| MA1090 | 151 | <a href="#">20089960</a> | <a href="#">50S ribosomal protein L19e</a>                              | <a href="#">LSU ribosomal protein L19E (<i>rpl19e</i>)</a>                                                                                              | CL2 | Yes | no change     | COG2147J |

|        |     |                          |                                                                     |                                                                                                                                                            |     |     |               |           |
|--------|-----|--------------------------|---------------------------------------------------------------------|------------------------------------------------------------------------------------------------------------------------------------------------------------|-----|-----|---------------|-----------|
| MA1091 | 174 | <a href="#">20089961</a> | <a href="#">50S ribosomal protein L18P</a>                          | <a href="#">LSU ribosomal protein L18P (rpl18p)</a>                                                                                                        | CL2 | Yes | no change     | COG0256J  |
| MA1092 | 209 | <a href="#">20089962</a> | <a href="#">30S ribosomal protein S5P</a>                           | <a href="#">SSU ribosomal protein S5P (rps5p)</a>                                                                                                          | CL2 | Yes | no change     | COG0098J  |
| MA1093 | 153 | <a href="#">20089963</a> | <a href="#">50S ribosomal protein L30P</a>                          | <a href="#">LSU ribosomal protein L30P (rpl30p)</a>                                                                                                        | CL2 | Yes | no change     | COG1841J  |
| MA1095 | 491 | <a href="#">20089965</a> | <a href="#">preprotein translocase subunit SecY</a>                 | <a href="#">Preprotein translocase SecY subunit</a>                                                                                                        | CL2 | Yes | no change     | COG0201U  |
| MA1103 | 206 | <a href="#">20089972</a> | <a href="#">Integral membrane protein</a>                           | <a href="#">Integral membrane protein DUF106</a>                                                                                                           | CL4 | Yes | more specific | COG1422S  |
| MA1108 | 182 | <a href="#">20089977</a> | <a href="#">30S ribosomal protein S13P</a>                          | <a href="#">SSU ribosomal protein S13P (rps13p)</a>                                                                                                        | CL2 | Yes | no change     | COG0099J  |
| MA1110 | 126 | <a href="#">20089979</a> | <a href="#">30S ribosomal protein S11P</a>                          | <a href="#">SSU ribosomal protein S11P (rps11p)</a>                                                                                                        | CL2 | Yes | no change     | COG0100J  |
| MA1118 | 406 | <a href="#">20089984</a> | <a href="#">ABC transporter, permease protein</a>                   | <a href="#">protein of unknown function DUF214</a>                                                                                                         | CL4 | nd  | less specific | COG0577V  |
| MA1120 | 312 | <a href="#">20089986</a> | <a href="#">ABC transporter, ATP-binding protein</a>                | <a href="#">ABC transporter, ATPase subunit</a>                                                                                                            | CL2 | nd  | no change     | COG1136V  |
| MA1152 | 362 | <a href="#">20090018</a> | <a href="#">fructose 1,6-bisphosphatase II</a>                      | <a href="#">Fructose 1-6-bisphosphatase</a>                                                                                                                | CL2 | Yes | no change     | COG1494G  |
| MA1167 | 283 | <a href="#">20090033</a> | <a href="#">ribose-phosphate pyrophosphokinase</a>                  | <a href="#">Ribose-phosphate pyrophosphokinase (RPPK) (Phosphoribosyl pyrophosphate synthetase) (PRPP synthetase) (EC 2.7.6.1)</a>                         | CL2 | Yes | no change     | COG0462FE |
| MA1168 | 158 | <a href="#">20090034</a> | <a href="#">putative molybdenum cofactor biosynthesis protein C</a> | <a href="#">Molybdenum cofactor biosynthesis protein C (moaC)</a>                                                                                          | CL2 | nd  | more specific | COG0315H  |
| MA1185 | 311 | <a href="#">20090051</a> | <a href="#">UDP-glucose 4-epimerase</a>                             | <a href="#">UDP-galactose -4-epimerase</a>                                                                                                                 | CL3 | Yes | more specific | COG0451MG |
| MA1193 | 316 | <a href="#">20090059</a> | <a href="#">hypothetical protein MA1193</a>                         | <a href="#">hypothetical protein</a>                                                                                                                       | CL5 | nd  | no change     | COG1665S  |
| MA1223 | 164 | <a href="#">20090087</a> | <a href="#">3-isopropylmalate dehydratase</a>                       | <a href="#">3-Isopropylmalate dehydratase small subunit (3-isopropylmalate isomerase small subunit) and homoaconitase small subunit - dual specificity</a> | CL2 | nd  | more specific | COG0066E  |
| MA1237 | 276 | <a href="#">20090101</a> | <a href="#">molybdate ABC transporter, solute-binding protein</a>   | <a href="#">molybdenum ABC transporter, molybdate-binding protein (modA)</a>                                                                               | CL3 | nd  | no change     | COG0725P  |
| MA1241 | 441 | <a href="#">20090105</a> | <a href="#">formylmethanofuran dehydrogenase, subunit B</a>         | <a href="#">Molybdenum formylmethanofuran dehydrogenase subunit B (fmdB) (EC 1.2.99.5)</a>                                                                 | CL2 | nd  | no change     | COG1029C  |
| MA1255 | 102 | <a href="#">20090119</a> | <a href="#">30S ribosomal protein S10P</a>                          | <a href="#">SSU ribosomal protein S10P (rps10p)</a>                                                                                                        | CL2 | Yes | no change     | COG0051J  |

|        |      |                          |                                                            |                                                                                                 |     |     |               |                              |
|--------|------|--------------------------|------------------------------------------------------------|-------------------------------------------------------------------------------------------------|-----|-----|---------------|------------------------------|
| MA1256 | 422  | <a href="#">20090120</a> | <a href="#">elongation factor 1-alpha</a>                  | <a href="#">translation elongation factor EF-1, subunit alpha (EF-1A, EF-Tu)</a>                | CL2 | Yes | no change     | COG5256J                     |
| MA1257 | 730  | <a href="#">20090121</a> | <a href="#">elongation factor EF-2</a>                     | <a href="#">translation elongation factor EF-2</a>                                              | CL1 | Yes | no change     | COG0480J                     |
| MA1258 | 189  | <a href="#">20090122</a> | <a href="#">30S ribosomal protein S7P</a>                  | <a href="#">SSU ribosomal protein S7P (rps7p)</a>                                               | CL2 | Yes | no change     | COG0049J                     |
| MA1259 | 142  | <a href="#">20090123</a> | <a href="#">30S ribosomal protein S12P</a>                 | <a href="#">SSU ribosomal protein S12P (rps12p)</a>                                             | CL2 | Yes | no change     | COG0048J                     |
| MA1261 | 99   | <a href="#">20090125</a> | <a href="#">50S ribosomal protein L30e</a>                 | <a href="#">LSU ribosomal protein L30E (rpl30e)</a>                                             | CL2 | Yes | no change     | COG1911J                     |
| MA1262 | 397  | <a href="#">20090126</a> | <a href="#">DNA-directed RNA polymerase subunit A''</a>    | <a href="#">DNA-directed RNA polymerase subunit A'', rpoA2</a>                                  | CL2 | Yes | no change     | COG0086K                     |
| MA1263 | 880  | <a href="#">20090127</a> | <a href="#">DNA-directed RNA polymerase subunit alpha</a>  | <a href="#">DNA-directed RNA polymerase subunit A', rpoA1</a>                                   | CL2 | Yes | no change     | COG0086K                     |
| MA1264 | 604  | <a href="#">20090128</a> | <a href="#">DNA-directed RNA polymerase subunit B'</a>     | <a href="#">DNA-directed RNA polymerase subunit B', rpoB1</a>                                   | CL2 | nd  | no change     | COG0085K                     |
| MA1265 | 550  | <a href="#">20090129</a> | <a href="#">DNA-directed RNA polymerase subunit beta''</a> | <a href="#">DNA-directed RNA polymerase subunit B'', rpoB2</a>                                  | CL2 | Yes | no change     | COG0085K                     |
| MA1266 | 78   | <a href="#">20090130</a> | <a href="#">DNA-directed RNA polymerase subunit H</a>      | <a href="#">DNA-directed RNA polymerase subunit H, rpoH</a>                                     | CL2 | Yes | no change     | COG2012K                     |
| MA1267 | 616  | <a href="#">20090131</a> | <a href="#">sensory transduction histidine kinase</a>      | <a href="#">Multisensor signal transduction histidine kinase</a>                                | CL4 | nd  | more specific | COG0784T, COG2202T, COG3920T |
| MA1275 | 411  | <a href="#">20090139</a> | <a href="#">S-adenosyl-L-homocysteine hydrolase</a>        | <a href="#">Adenosylhomocysteinase (ahcY) (EC 3.3.1.1)</a>                                      | CL2 | Yes | no change     | COG0499H                     |
| MA1276 | 442  | <a href="#">20090140</a> | <a href="#">N-ethylmeline chlorohydrolase</a>              | <a href="#">metal-dependent hydrolase</a>                                                       | CL3 | Yes | less specific | COG0402FR                    |
| MA1284 | 339  | <a href="#">20090148</a> | <a href="#">hypothetical protein MA1284</a>                | <a href="#">Hypothetical protein</a>                                                            | CL5 | nd  | no change     | -                            |
| MA1288 | 272  | <a href="#">20090152</a> | <a href="#">23S RNA methyltransferase J</a>                | <a href="#">ribosomal RNA large subunit methyltransferase RrmJ/FtsJ (EC 2.1.1.-)</a>            | CL2 | Yes | no change     | COG0293J, COG3269R           |
| MA1289 | 218  | <a href="#">20090153</a> | <a href="#">hypothetical protein MA1289</a>                | <a href="#">Hypothetical protein with PHP domain</a>                                            | CL4 | nd  | more specific | COG1387ER                    |
| MA1291 | 218  | <a href="#">20090155</a> | <a href="#">hypothetical protein MA1291</a>                | <a href="#">Hypothetical protein with PHP domain</a>                                            | CL4 | nd  | more specific | COG1387ER                    |
| MA1318 | 491  | <a href="#">20090180</a> | <a href="#">argininosuccinate lyase</a>                    | <a href="#">Argininosuccinate lyase (EC 4.3.2.1) (Arginosuccinase)</a>                          | CL2 | Yes | no change     | COG0165E                     |
| MA1322 | 1428 | <a href="#">20090183</a> | <a href="#">sensory transduction histidine kinase</a>      | <a href="#">pleD (response regulator)-like multisensor signal transduction histidine kinase</a> | CL4 | nd  | no change     | COG2202T, COG3920T           |
| MA1335 | 76   | <a href="#">20090196</a> | <a href="#">hypothetical protein MA1335</a>                | <a href="#">N-acetylglucosamine-1-phosphate uridylyltransferase (EC 2.7.7.23)</a>               | CL3 | nd  | more specific | -                            |

|        |     |                          |                                                                     |                                                                                                                   |     |     |               |           |
|--------|-----|--------------------------|---------------------------------------------------------------------|-------------------------------------------------------------------------------------------------------------------|-----|-----|---------------|-----------|
| MA1344 | 81  | <a href="#">20090205</a> | <a href="#">hypothetical protein MA1344</a>                         | <a href="#">hypothetical protein</a>                                                                              | CL5 | nd  | no change     | COG4895S  |
| MA1351 | 105 | <a href="#">20090212</a> | <a href="#">translation initiation factor IF-1A</a>                 | <a href="#">translation initiation factor aIF-1A</a>                                                              | CL2 | nd  | no change     | COG0361J  |
| MA1353 | 110 | <a href="#">20090214</a> | <a href="#">translation initiation factor IF-1A</a>                 | <a href="#">translation initiation factor aIF-1A</a>                                                              | CL2 | nd  | no change     | COG0361J  |
| MA1363 | 284 | <a href="#">20090224</a> | <a href="#">phosphoglycolate phosphatase</a>                        | <a href="#">HAD-superfamily hydrolase</a>                                                                         | CL4 | nd  | less specific | COG1011R  |
| MA1370 | 266 | <a href="#">20090231</a> | <a href="#">diphthine synthase</a>                                  | <a href="#">diphthine synthase (EC 2.1.1.98)</a>                                                                  | CL2 | Yes | no change     | COG1798J  |
| MA1372 | 129 | <a href="#">20090233</a> | <a href="#">hypothetical protein MA1372</a>                         | <a href="#">DUF555-containing protein</a>                                                                         | CL4 | Yes | more specific | COG1885S  |
| MA1376 | 131 | <a href="#">20090237</a> | <a href="#">phosphoribosylaminoimidazole carboxylase</a>            | <a href="#">Phosphoribosylaminoimidazole carboxylase catalytic subunit (AIR carboxylase) (purE) (EC 4.1.1.21)</a> | CL2 | Yes | no change     | COG0041F  |
| MA1381 | 213 | <a href="#">20090242</a> | <a href="#">GTP-binding protein</a>                                 | <a href="#">GTP-binding domain protein</a>                                                                        | CL4 | Yes | less specific | COG1100R  |
| MA1382 | 119 | <a href="#">20090243</a> | <a href="#">hypothetical protein MA1382</a>                         | <a href="#">protein of unknown function UCP004977</a>                                                             | CL4 | Yes | more specific | COG3365S  |
| MA1384 | 216 | <a href="#">20090245</a> | <a href="#">6-phospho-3-hexuloisomerase</a>                         | <a href="#">6-phospho-3-hexuloisomerase</a>                                                                       | CL2 | Yes | no change     | COG0794M  |
| MA1385 | 370 | <a href="#">20090246</a> | <a href="#">aspartate aminotransferase</a>                          | <a href="#">Aspartate aminotransferase (EC 2.6.1.1)</a>                                                           | CL2 | Yes | no change     | COG0436E  |
| MA1391 | 291 | <a href="#">20090252</a> | <a href="#">hypothetical protein MA1391</a>                         | <a href="#">CBS (Cystathionine-beta-synthase) and DUF293 domains-containing protein</a>                           | CL4 | Yes | more specific | COG2524K  |
| MA1393 | 420 | <a href="#">20090254</a> | <a href="#">3-isopropylmalate dehydratase</a>                       | <a href="#">Homoaconitase large subunit (EC 4.2.1.36) (homoaconitate hydratase) (hacA)</a>                        | CL2 | Yes | more specific | COG0065E  |
| MA1396 | 167 | <a href="#">20090257</a> | <a href="#">hypothetical protein MA1396</a>                         | <a href="#">amino acid binding-domain protein</a>                                                                 | CL4 | nd  | more specific | COG2150R  |
| MA1422 | 550 | <a href="#">20090282</a> | <a href="#">acyl-CoA synthetase</a>                                 | <a href="#">fatty-acid--CoA ligase (Acyl-CoA synthetase) (EC 6.2.1.-)</a>                                         | CL3 | nd  | no change     | COG0318IQ |
| MA1423 | 151 | <a href="#">20090283</a> | <a href="#">hypothetical protein MA1423</a>                         | <a href="#">thioesterase superfamily protein</a>                                                                  | CL4 | Yes | more specific | COG0824R  |
| MA1424 | 192 | <a href="#">20090284</a> | <a href="#">transcriptional regulator</a>                           | <a href="#">HTH-type transcriptional regulator</a>                                                                | CL3 | Yes | more specific | COG1396K  |
| MA1425 | 477 | <a href="#">20090285</a> | <a href="#">transposase</a>                                         | <a href="#">transposase</a>                                                                                       | CL4 | Yes | no change     | COG3436L  |
| MA1435 | 399 | <a href="#">20090295</a> | <a href="#">potassium channel protein</a>                           | <a href="#">protein with PhoU and TrkA-C domains</a>                                                              | CL4 | Yes | more specific | COG3273S  |
| MA1442 | 197 | <a href="#">20090301</a> | <a href="#">hypothetical protein MA1442</a>                         | <a href="#">DUF655 containing protein</a>                                                                         | CL4 | Yes | more specific | COG1491J  |
| MA1446 | 97  | <a href="#">20090305</a> | <a href="#">50S ribosomal protein L21e</a>                          | <a href="#">LSU ribosomal protein L21E (rpl21e)</a>                                                               | CL2 | Yes | no change     | COG2139J  |
| MA1447 | 431 | <a href="#">20090306</a> | <a href="#">hypothetical protein MA1447</a>                         | <a href="#">THUMP-domain containing protein</a>                                                                   | CL4 | nd  | more specific | COG1258J  |
| MA1460 | 246 | <a href="#">20090319</a> | <a href="#">phage shock protein A</a>                               | <a href="#">Phage shock protein A PspA/IM30</a>                                                                   | CL4 | Yes | no change     | COG1842KT |
| MA1468 | 147 | <a href="#">20090327</a> | <a href="#">response regulator receiver</a>                         | <a href="#">Response regulator receiver</a>                                                                       | CL4 | nd  | no change     | COG0784T  |
| MA1469 | 137 | <a href="#">20090328</a> | <a href="#">response regulator receiver</a>                         | <a href="#">Response regulator receiver</a>                                                                       | CL4 | Yes | no change     | COG0784T  |
| MA1471 | 89  | <a href="#">20090330</a> | <a href="#">elongation factor 1-beta</a>                            | <a href="#">translation elongation factor EF-1 beta (EF-1-beta)</a>                                               | CL2 | Yes | no change     | COG2092J  |
| MA1478 | 617 | <a href="#">20090337</a> | <a href="#">heat shock protein 70</a>                               | <a href="#">Chaperone DnaK (Hsp70)</a>                                                                            | CL2 | Yes | no change     | COG0443O  |
| MA1482 | 448 | <a href="#">20090341</a> | <a href="#">potassium transporter peripheral membrane component</a> | <a href="#">Potassium uptake protein TrkA</a>                                                                     | CL2 | Yes | no change     | COG0569P  |



|        |     |                           |                                                           |                                                                         |     |      |               |           |
|--------|-----|---------------------------|-----------------------------------------------------------|-------------------------------------------------------------------------|-----|------|---------------|-----------|
| MA1484 | 407 | <a href="#">20090343</a>  | <a href="#">geranylgeranyl reductase</a>                  | <a href="#">Oxidoreductase with FAD binding domain</a>                  | CL4 | Yes  | less specific | COG0644C  |
| MA1485 | 102 | <a href="#">20090344</a>  | <a href="#">ferredoxin</a>                                | <a href="#">4Fe-4S ferredoxin, iron-sulfur protein</a>                  | CL4 | Yes  | no change     | COG1145C  |
| MA1489 | 384 | <a href="#">161484937</a> | <a href="#">FO synthase subunit 2</a>                     | <a href="#">Hypothetical protein</a>                                    | CL5 | Yes* | less specific | COG1060HR |
| MA1495 | 124 | <a href="#">20090354</a>  | <a href="#">F(420)H(2) dehydrogenase, subunit FpoA</a>    | <a href="#">F420H2 dehydrogenase subunit A</a>                          | CL2 | Yes  | no change     | COG0838C  |
| MA1496 | 184 | <a href="#">20090355</a>  | <a href="#">F(420)H(2) dehydrogenase, subunit FpoB</a>    | <a href="#">F420H2 dehydrogenase subunit B (fpoB)</a>                   | CL2 | Yes  | no change     | COG0377C  |
| MA1497 | 158 | <a href="#">20090356</a>  | <a href="#">NADH dehydrogenase subunit C</a>              | <a href="#">F420H2 dehydrogenase subunit C (fpoC)</a>                   | CL2 | Yes  | more specific | COG0852C  |
| MA1498 | 374 | <a href="#">20090357</a>  | <a href="#">F(420)H(2) dehydrogenase, subunit FpoD</a>    | <a href="#">F420H2 dehydrogenase subunit D (fpoD)</a>                   | CL2 | Yes  | no change     | COG0649C  |
| MA1499 | 348 | <a href="#">20090358</a>  | <a href="#">F(420)H(2) dehydrogenase, subunit FpoH</a>    | <a href="#">F420H2 dehydrogenase subunit H</a>                          | CL2 | Yes  | no change     | COG1005C  |
| MA1503 | 102 | <a href="#">20090362</a>  | <a href="#">F(420)H(2) dehydrogenase, subunit FpoK</a>    | <a href="#">F420H2 dehydrogenase subunit K</a>                          | CL2 | Yes  | no change     | COG0713C  |
| MA1504 | 672 | <a href="#">20090363</a>  | <a href="#">F(420)H(2) dehydrogenase, subunit FpoL</a>    | <a href="#">F420H2 dehydrogenase subunit L</a>                          | CL2 | Yes  | no change     | COG1009CP |
| MA1505 | 495 | <a href="#">20090364</a>  | <a href="#">F(420)H(2) dehydrogenase, subunit FpoM</a>    | <a href="#">F420H2 dehydrogenase subunit M</a>                          | CL2 | Yes  | no change     | COG1008C  |
| MA1506 | 489 | <a href="#">20090365</a>  | <a href="#">F(420)H(2) dehydrogenase, subunit FpoN</a>    | <a href="#">F420H2 dehydrogenase subunit N</a>                          | CL3 | Yes  | no change     | COG1007C  |
| MA1521 | 120 | <a href="#">20090380</a>  | <a href="#">50S ribosomal protein L7Ae</a>                | <a href="#">LSU ribosomal protein L7Ae (rpl7ae)</a>                     | CL2 | Yes  | no change     | COG1358J  |
| MA1522 | 76  | <a href="#">20090381</a>  | <a href="#">30S ribosomal protein S28e</a>                | <a href="#">SSU ribosomal protein S28E (rps28e)</a>                     | CL2 | Yes  | no change     | COG2053J  |
| MA1523 | 62  | <a href="#">20090382</a>  | <a href="#">50S ribosomal protein L24e</a>                | <a href="#">LSU ribosomal protein L24E (rpl24e)</a>                     | CL2 | Yes  | no change     | COG2075J  |
| MA1524 | 151 | <a href="#">20090383</a>  | <a href="#">nucleoside-diphosphate kinase (ndk)</a>       | <a href="#">Nucleoside diphosphate kinase (EC 2.7.4.6)</a>              | CL2 | Yes  | no change     | COG0105F  |
| MA1525 | 597 | <a href="#">20090384</a>  | <a href="#">translation initiation factor IF-2 (infB)</a> | <a href="#">translation initiation factor IF-2 (eIF-5B)</a>             | CL2 | Yes  | no change     | COG0532J  |
| MA1536 | 356 | <a href="#">20090395</a>  | <a href="#">ABC transporter, ATP-binding protein</a>      | <a href="#">ABC transporter, ATPase subunit</a>                         | CL2 | nd   | more specific | COG1131V  |
| MA1546 | 294 | <a href="#">20090404</a>  | <a href="#">hypothetical protein MA1546</a>               | <a href="#">Hypothetical protein</a>                                    | CL5 | nd   | no change     | COG1277R  |
| MA1547 | 301 | <a href="#">20090405</a>  | <a href="#">hypothetical protein MA1547</a>               | <a href="#">Hypothetical protein</a>                                    | CL5 | nd   | no change     | COG1277R  |
| MA1548 | 524 | <a href="#">20090406</a>  | <a href="#">hypothetical protein MA1548</a>               | <a href="#">protein with TolB-like six-bladed beta-propeller domain</a> | CL5 | nd   | more specific | COG0823U  |
| MA1549 | 159 | <a href="#">20090407</a>  | <a href="#">hypothetical protein MA1549</a>               | <a href="#">NHL repeat domain (Beta propeller clan) protein</a>         | CL4 | Yes  | more specific | -         |
| MA1550 | 140 | <a href="#">20090408</a>  | <a href="#">hypothetical protein MA1550</a>               | <a href="#">protein with ion channel domain</a>                         | CL4 | nd   | more specific | COG1226P  |

|        |     |                          |                                                                                                 |                                                                                                    |     |      |               |                    |
|--------|-----|--------------------------|-------------------------------------------------------------------------------------------------|----------------------------------------------------------------------------------------------------|-----|------|---------------|--------------------|
| MA1554 | 138 | <a href="#">20090412</a> | <a href="#">hypothetical protein MA1554</a>                                                     | <a href="#">pyridoxamine 5'-phosphate oxidase-related, FMN-binding</a>                             | CL4 | nd   | more specific | COG3576R           |
| MA1567 | 350 | <a href="#">20090425</a> | <a href="#">pyridoxine biosynthesis protein</a>                                                 | <a href="#">Pyridoxal 5'-phosphate (Vitamin B6) synthase, lyase subunit pdxS</a>                   | CL2 | Yes  | more specific | COG0214H           |
| MA1583 | 929 | <a href="#">20090441</a> | <a href="#">DNA topoisomerase (ATP-hydrolyzing), subunit A</a>                                  | <a href="#">DNA gyrase subunit A</a>                                                               | CL2 | Yes  | no change     | COG0188L           |
| MA1584 | 634 | <a href="#">20090442</a> | <a href="#">DNA topoisomerase (ATP-hydrolyzing), subunit B</a>                                  | <a href="#">DNA gyrase subunit B</a>                                                               | CL2 | nd   | no change     | COG0187L           |
| MA1586 | 393 | <a href="#">20090444</a> | <a href="#">DNA topoisomerase VI subunit A</a>                                                  | <a href="#">DNA topoisomerase, type VI subunit A</a>                                               | CL2 | Yes  | no change     | COG1697L           |
| MA1587 | 621 | <a href="#">20090445</a> | <a href="#">DNA topoisomerase VI subunit B</a>                                                  | <a href="#">DNA topoisomerase, type VI subunit B</a>                                               | CL2 | nd   | no change     | COG1389L           |
| MA1589 | 203 | <a href="#">20090447</a> | <a href="#">hypothetical protein MA1589</a>                                                     | <a href="#">protein of unknown function with UPF0228 domain</a>                                    | CL4 | nd   | more specific | -                  |
| MA1590 | 453 | <a href="#">20090448</a> | <a href="#">surface antigen gene</a>                                                            | <a href="#">NHL repeat domain (Beta propeller clan) containing protein</a>                         | CL4 | nd   | more specific | COG3391S           |
| MA1591 | 443 | <a href="#">20090449</a> | <a href="#">surface antigen gene</a>                                                            | <a href="#">NHL repeat domain (Beta propeller clan) protein</a>                                    | CL4 | nd   | more specific | COG3391S           |
| MA1604 | 71  | <a href="#">20090462</a> | <a href="#">hypothetical protein MA1604</a>                                                     | <a href="#">Hypothetical protein</a>                                                               | CL5 | nd   | no change     | -                  |
| MA1611 | 961 | <a href="#">20090469</a> | <a href="#">leucyl-tRNA synthetase</a>                                                          | <a href="#">Leucyl-tRNA synthetase (EC 6.1.1.4)</a>                                                | CL2 | Yes  | no change     | COG0495J           |
| MA1614 | 195 | <a href="#">20090472</a> | <a href="#">hypothetical protein MA1614</a>                                                     | <a href="#">protein with ADP-ribose binding-domain, UPF0189 family</a>                             | CL4 | nd   | more specific | COG2110R           |
| MA1615 | 339 | <a href="#">20090473</a> | <a href="#">methylcobalamin:coenzyme M methyltransferase (cmtM)</a>                             | <a href="#">methanol-specific methylcobalamin:CoM methyltransferase (mtaA)</a>                     | CL2 | Yes  | more specific | COG0407H           |
| MA1616 | 461 | <a href="#">20090474</a> | <a href="#">methanol-5-hydroxybenzimidazolycobamide co-methyltransferase, isozyme 3</a>         | <a href="#">methanol-5-hydroxybenzimidazolycobamide co-methyltransferase (mtaB3) (EC 2.1.1.90)</a> | CL1 | Yes  | no change     | -                  |
| MA1617 | 260 | <a href="#">20090475</a> | <a href="#">methanol-5-hydroxybenzimidazolycobamide co-methyltransferase, isozyme 3 (mtaC3)</a> | <a href="#">corrinoid-containing methyl-accepting protein (mtaC3)</a>                              | CL1 | Yes* | more specific | COG5012R           |
| MA1627 | 962 | <a href="#">20090482</a> | <a href="#">sensory transduction histidine kinase</a>                                           | <a href="#">Multisensor signal transduction histidine kinase</a>                                   | CL4 | nd   | no change     | COG2202T, COG3920T |
| MA1628 | 899 | <a href="#">20090483</a> | <a href="#">sensory transduction histidine kinase</a>                                           | <a href="#">Multisensor signal transduction histidine kinase</a>                                   | CL4 | nd   | no change     | COG2202T, COG3920T |
| MA1645 | 886 | <a href="#">20090498</a> | <a href="#">sensory transduction histidine kinase</a>                                           | <a href="#">GAF-containing Multisensor signal transduction histidine kinase</a>                    | CL4 | nd   | more specific | COG2202T, COG3920T |
| MA1672 | 429 | <a href="#">20090525</a> | <a href="#">phosphopyruvate hydratase</a>                                                       | <a href="#">Enolase (2-phosphoglycerate dehydratase) (EC 4.2.1.11)</a>                             | CL2 | Yes  | no change     | COG0148G           |

|        |      |                          |                                                                           |                                                                                                                                                                          |     |     |               |                    |
|--------|------|--------------------------|---------------------------------------------------------------------------|--------------------------------------------------------------------------------------------------------------------------------------------------------------------------|-----|-----|---------------|--------------------|
| MA1678 | 839  | <a href="#">20090530</a> | <a href="#">H(+)-transporting ATPase</a>                                  | <a href="#">Plasma-membrane proton-efflux P-type ATPase (EC 3.6.3.6)</a>                                                                                                 | CL2 | Yes | more specific | COG0474P           |
| MA1684 | 444  | <a href="#">20090536</a> | <a href="#">aspartyl-tRNA synthetase</a>                                  | <a href="#">Aspartyl-tRNA synthetase (EC 6.1.1.12)</a>                                                                                                                   | CL2 | Yes | no change     | COG0017J           |
| MA1691 | 464  | <a href="#">20090543</a> | <a href="#">hypothetical protein MA1691</a>                               | <a href="#">Protein of unknown function DUF711</a>                                                                                                                       | CL4 | nd  | more specific | COG2848S           |
| MA1696 | 111  | <a href="#">20090548</a> | <a href="#">hypothetical protein MA1696</a>                               | <a href="#">Hypothetical protein</a>                                                                                                                                     | CL5 | nd  | no change     | COG1196D           |
| MA1708 | 231  | <a href="#">20090560</a> | <a href="#">uncharacterized Fe-S protein</a>                              | <a href="#">Uncharacterized Fe-S protein</a>                                                                                                                             | CL4 | nd  | no change     | COG1600C           |
| MA1710 | 321  | <a href="#">20090562</a> | <a href="#">N(5),N(10)-methenyltetrahydromethanopterin cyclohydrolase</a> | <a href="#">methenyltetrahydromethanopterin cyclohydrolase (mch) (EC 3.5.4.27)</a>                                                                                       | CL2 | Yes | no change     | COG3252H           |
| MA1712 | 389  | <a href="#">20090564</a> | <a href="#">aspartate aminotransferase</a>                                | <a href="#">Aminotransferase class I/II (EC 2.6.1.-)</a>                                                                                                                 | CL3 | Yes | less specific | COG0436E           |
| MA1724 | 379  | <a href="#">20090576</a> | <a href="#">hypothetical protein MA1724</a>                               | <a href="#">Small-conductance mechanosensitive ion channel</a>                                                                                                           | CL3 | Yes | more specific | COG0668M           |
| MA1725 | 435  | <a href="#">20090577</a> | <a href="#">phenylacetate-CoA ligase</a>                                  | <a href="#">Phenylacetate-coenzyme A ligase (EC 6.2.1.30)</a>                                                                                                            | CL2 | Yes | no change     | COG1541H           |
| MA1726 | 203  | <a href="#">20090578</a> | <a href="#">indolepyruvate oxidoreductase subunit B</a>                   | <a href="#">Indolepyruvate ferredoxin oxidoreductase subunit beta (iorB)</a>                                                                                             | CL3 | Yes | no change     | COG1014C           |
| MA1727 | 619  | <a href="#">20090579</a> | <a href="#">indolepyruvate ferredoxin oxidoreductase, subunit alpha</a>   | <a href="#">Protein containing N-terminal Pyruvate flavodoxin/ferredoxin oxidoreductase region, C-terminal TPP-binding region and ferredoxin domain</a>                  | CL4 | Yes | less specific | COG4231C           |
| MA1736 | 160  | <a href="#">20090588</a> | <a href="#">Mov34 family protein</a>                                      | <a href="#">metal-dependent protease, JAMM-like</a>                                                                                                                      | CL2 | Yes | more specific | COG1310R           |
| MA1752 | 224  | <a href="#">20090604</a> | <a href="#">ABC transporter, ATP-binding protein</a>                      | <a href="#">Iron complex/vitamin B12 ABC transporter ATPase subunit</a>                                                                                                  | CL3 | nd  | more specific | COG1136V           |
| MA1759 | 466  | <a href="#">20090610</a> | <a href="#">hypothetical protein MA1759</a>                               | <a href="#">hypothetical protein</a>                                                                                                                                     | CL5 | nd  | no change     | -                  |
| MA1762 | 3988 | <a href="#">20090613</a> | <a href="#">cell surface protein</a>                                      | <a href="#">Protein containing N-terminal subtilase (Peptidase S8) family domain + central repeat Fibronectin type III (fn3) domains + C-terminal repeat PDK domains</a> | CL4 | nd  | more specific | COG1520S, COG3291R |
| MA1775 | 94   | <a href="#">20090626</a> | <a href="#">50S ribosomal protein L37Ae</a>                               | <a href="#">LSU ribosomal protein L37Ae (rpl37ae)</a>                                                                                                                    | CL2 | Yes | no change     | COG1997J           |
| MA1778 | 230  | <a href="#">20090629</a> | <a href="#">putative RNA-associated protein</a>                           | <a href="#">Ancient conserved region within archaeal exosome superoperon, UPF0023 domain protein</a>                                                                     | CL4 | Yes | more specific | COG1500J           |
| MA1779 | 247  | <a href="#">20090630</a> | <a href="#">proteasome subunit alpha</a>                                  | <a href="#">Proteasome alpha subunit (psmA) (EC 3.4.25.1)</a>                                                                                                            | CL2 | Yes | no change     | COG0638O           |

|        |      |                          |                                                                       |                                                                                                  |     |     |               |                       |
|--------|------|--------------------------|-----------------------------------------------------------------------|--------------------------------------------------------------------------------------------------|-----|-----|---------------|-----------------------|
| MA1784 | 196  | <a href="#">20090635</a> | <a href="#">50S ribosomal protein L15e</a>                            | <a href="#">LSU ribosomal protein L15E (rpl15e)</a>                                              | CL2 | Yes | no change     | COG1632J              |
| MA1786 | 301  | <a href="#">20090637</a> | <a href="#">transposase</a>                                           | <a href="#">transposase</a>                                                                      | CL4 | nd  | no change     | COG0675L              |
| MA1790 | 428  | <a href="#">20090641</a> | <a href="#">thiamine biosynthesis protein ThiC</a>                    | <a href="#">Thiamine biosynthesis protein thiC (thiC)</a>                                        | CL2 | Yes | no change     | COG0422H              |
| MA1802 | 553  | <a href="#">20090653</a> | <a href="#">dihydroxy-acid dehydratase (ilvD)</a>                     | <a href="#">Dihydroxyacid dehydratase, EC 4.2.1.9</a>                                            | CL2 | Yes | no change     | COG0129EG             |
| MA1806 | 280  | <a href="#">20090657</a> | <a href="#">methyltransferase</a>                                     | <a href="#">methyltransferase MtxX</a>                                                           | CL3 | Yes | no change     | COG4002R              |
| MA1817 | 154  | <a href="#">20090668</a> | <a href="#">riboflavin synthase (ribC)</a>                            | <a href="#">riboflavin synthase</a>                                                              | CL2 | Yes | no change     | COG1731H              |
| MA1818 | 134  | <a href="#">20090669</a> | <a href="#">riboflavin synthase subunit beta</a>                      | <a href="#">6,7-dimethyl-8-ribityllumazine synthase (ribH) (EC 2.5.1.9)</a>                      | CL3 | Yes | no change     | COG0054H              |
| MA1819 | 380  | <a href="#">20090670</a> | <a href="#">aspartate aminotransferase (aspB)</a>                     | <a href="#">Aspartate aminotransferase (EC 2.6.1.1)</a>                                          | CL2 | Yes | no change     | COG0436E              |
| MA1820 | 151  | <a href="#">20090671</a> | <a href="#">glycerol-3-phosphate cytidyltransferase (taqD)</a>        | <a href="#">Cytidyltransferase-related protein</a>                                               | CL4 | Yes | less specific | COG0615MI             |
| MA1821 | 500  | <a href="#">20090672</a> | <a href="#">hypothetical protein MA1821</a>                           | <a href="#">CBS-domain and DUF39-domain containing protein</a>                                   | CL4 | Yes | more specific | COG0517R,<br>COG1900S |
| MA1838 | 919  | <a href="#">20090688</a> | <a href="#">cell surface protein</a>                                  | <a href="#">NHL repeat domain (Beta propeller clan) protein</a>                                  | CL4 | nd  | more specific | COG3291R,<br>COG3391S |
| MA1904 | 1698 | <a href="#">20090753</a> | <a href="#">hypothetical protein MA1904</a>                           | <a href="#">NHL repeat domain (Beta propeller clan) protein</a>                                  | CL4 | nd  | more specific | COG3291R,<br>COG3391S |
| MA1956 | 545  | <a href="#">20090804</a> | <a href="#">phenylalanyl-tRNA synthetase subunit beta</a>             | <a href="#">Phenylalanyl-tRNA synthetase, beta subunit (EC 6.1.1.20)</a>                         | CL2 | nd  | no change     | COG0072J              |
| MA1963 | 232  | <a href="#">20090811</a> | <a href="#">phosphoribosylformylglycinamide synthase subunit I</a>    | <a href="#">phosphoribosylformylglycinamide synthase I (FGAM synthase I) (purQ) (EC 6.3.5.3)</a> | CL2 | nd  | no change     | COG0047F              |
| MA1964 | 88   | <a href="#">20090812</a> | <a href="#">phosphoribosylformylglycinamide synthase subunit PurS</a> | <a href="#">phosphoribosylformylglycinamide synthetase PurS</a>                                  | CL2 | Yes | no change     | COG1828F              |
| MA1967 | 262  | <a href="#">20090815</a> | <a href="#">CODH nickel-insertion accessory protein</a>               | <a href="#">Carbon monoxide dehydrogenase accessory protein cooC</a>                             | CL2 | Yes | no change     | COG3640D              |
| MA1979 | 229  | <a href="#">20090827</a> | <a href="#">DNA repair protein RadC</a>                               | <a href="#">DNA repair protein RadC</a>                                                          | CL3 | nd  | no change     | COG2003L              |
| MA1997 | 112  | <a href="#">20090845</a> | <a href="#">hypothetical protein MA1997</a>                           | <a href="#">Hypothetical protein</a>                                                             | CL5 | nd  | no change     | COG0840NT             |
| MA1998 | 120  | <a href="#">20090846</a> | <a href="#">hypothetical protein MA1998</a>                           | <a href="#">Hypothetical protein</a>                                                             | CL5 | Yes | no change     | -                     |

(a) based on Allen, MA et al., 2009, ISME J. 3: 1012-1035 unless indicated otherwise.

(b) based on Ferguson, JT et al, 2009, J. Am. Soc. Mass Spect. 20: 1743-1750; Li, L et al, J. Prot Res. 2007 6: 759-771; Rohlin L & Gunsalus RP. 2010 BMC Microbiol. 10:62.

| Locus_tag | Length | Gi                       | Old Product Name                                                         | New Product Name (a)                                                                          | Confidence Level | Expressed in MA (b) | Change in Annotation | COG(s)                             |
|-----------|--------|--------------------------|--------------------------------------------------------------------------|-----------------------------------------------------------------------------------------------|------------------|---------------------|----------------------|------------------------------------|
| MA2008    | 350    | <a href="#">20090856</a> | <a href="#">sodium/calcium exchanger protein</a>                         | <a href="#">potassium-dependent sodium-calcium exchanger</a>                                  | CL3              | nd                  | no change            | COG0530P                           |
| MA2016    | 383    | <a href="#">20090864</a> | <a href="#">hypothetical protein MA2016</a>                              | <a href="#">hypothetical protein</a>                                                          | CL5              | nd                  | no change            | COG3385L                           |
| MA2085    | 411    | <a href="#">20090930</a> | <a href="#">cation efflux system protein</a>                             | <a href="#">Cation efflux family protein</a>                                                  | CL3              | Yes                 | no change            | COG0053P,<br>COG1433S              |
| MA2110    | 267    | <a href="#">20090954</a> | <a href="#">multidrug ABC transporter, ATP-binding protein</a>           | <a href="#">ABC transporter, ATPase subunit</a>                                               | CL3              | Yes                 | no change            | COG1131V                           |
| MA2111    | 294    | <a href="#">20090955</a> | <a href="#">heat shock protein HtpX</a>                                  | <a href="#">Peptidase, M48 family</a>                                                         | CL4              | Yes                 | more specific        | COG0501O                           |
| MA2117    | 112    | <a href="#">20090960</a> | <a href="#">hypothetical protein MA2117</a>                              | <a href="#">Divergent AAA domain protein</a>                                                  | CL4              | nd                  | more specific        | -                                  |
| MA2122    | 917    | <a href="#">20090965</a> | <a href="#">deoxyribonuclease</a>                                        | <a href="#">restriction endonuclease</a>                                                      | CL4              | nd                  | less specific        | COG4096V                           |
| MA2142    | 394    | <a href="#">20090985</a> | <a href="#">argininosuccinate synthase</a>                               | <a href="#">6.3.4.5) (Citrulline-aspartate ligase)</a>                                        | CL2              | Yes                 | no change            | COG0137E                           |
| MA2143    | 1070   | <a href="#">20090986</a> | <a href="#">carbamoyl phosphate synthase large subunit</a>               | <a href="#">Carbamoyl-phosphate synthase large chain (carB) (EC 6.3.5.5)</a>                  | CL2              | Yes                 | no change            | COG0458EF                          |
| MA2144    | 368    | <a href="#">20090987</a> | <a href="#">carbamoyl phosphate synthase small subunit</a>               | <a href="#">Carbamoyl-phosphate synthase small chain (carA) (EC 6.3.5.5)</a>                  | CL2              | Yes                 | no change            | COG0505EF                          |
| MA2145    | 491    | <a href="#">20090988</a> | <a href="#">ABC transporter, ATP-binding protein</a>                     | <a href="#">ATP-binding protein opuAA (EC 3.6.3.32)</a>                                       | CL2              | Yes                 | no change            | COG4175E                           |
| MA2146    | 276    | <a href="#">20090989</a> | <a href="#">proW glycine betaine/L-proline ABC transporter, permease</a> | <a href="#">Glycine betaine ABC transporter permease protein opuAB</a>                        | CL2              | nd                  | no change            | COG4176E                           |
| MA2147    | 315    | <a href="#">20090990</a> | <a href="#">ABC transporter, solute-binding protein</a>                  | <a href="#">Glycine betaine ABC transporter substrate binding protein opuAC</a>               | CL2              | Yes                 | no change            | COG2113E                           |
| MA2183    | 241    | <a href="#">20091025</a> | <a href="#">glucose-1-phosphate thymidyltransferase (rbfA)</a>           | <a href="#">Glucose-1-phosphate thymidyltransferase (dTDP-glucose synthase) (EC:2.7.7.24)</a> | CL2              | nd                  | no change            | COG1209M                           |
| MA2186    | 321    | <a href="#">20091027</a> | <a href="#">dTDP-glucose 4,6-dehydratase</a>                             | <a href="#">dTDP-glucose 4,6-dehydratase</a>                                                  | CL2              | nd                  | no change            | COG1088M                           |
| MA2218    | 136    | <a href="#">20091059</a> | <a href="#">potassium channel protein</a>                                | <a href="#">Hypothetical protein</a>                                                          | CL5              | Yes                 | less specific        | COG1226P                           |
| MA2225    | 86     | <a href="#">20091065</a> | <a href="#">hypothetical protein MA2225</a>                              | <a href="#">Hypothetical protein</a>                                                          | CL5              | nd                  | no change            | -                                  |
| MA2238    | 282    | <a href="#">20091078</a> | <a href="#">hypothetical protein MA2238</a>                              | <a href="#">protein of unknown function UCP004929</a>                                         | CL4              | Yes                 | more specific        | COG4022S                           |
| MA2246    | 426    | <a href="#">20091086</a> | <a href="#">squamous cell carcinoma antigen</a>                          | <a href="#">Serpine (serine protease inhibitor)</a>                                           | CL3              | nd                  | more specific        | COG4826O                           |
| MA2253    | 379    | <a href="#">20091092</a> | <a href="#">hypothetical protein MA2253</a>                              | <a href="#">Myo-inositol-1-phosphate synthase (EC 5.5.1.4)</a>                                | CL2              | nd                  | more specific        | COG1260I                           |
| MA2266    | 680    | <a href="#">20091104</a> | <a href="#">sensory transduction histidine kinase</a>                    | <a href="#">Multisensor signal transduction histidine kinase</a>                              | CL4              | Yes                 | no change            | COG0642T,<br>COG2202T,<br>COG3920T |
| MA2270    | 166    | <a href="#">20091108</a> | <a href="#">hypothetical protein MA2270</a>                              | <a href="#">Hypothetical protein</a>                                                          | CL5              | nd                  | no change            | COG3431S                           |
| MA2272    | 455    | <a href="#">20091110</a> | <a href="#">protein</a>                                                  | <a href="#">DUF214</a>                                                                        | CL4              | nd                  | less specific        | COG0577V                           |
| MA2273    | 395    | <a href="#">20091111</a> | <a href="#">hypothetical protein MA2273</a>                              | <a href="#">hypothetical protein</a>                                                          | CL5              | Yes                 | no change            | COG1361M                           |
| MA2275    | 237    | <a href="#">20091113</a> | <a href="#">protein</a>                                                  | <a href="#">ABC transporter, ATPase subunit</a>                                               | CL2              | Yes                 | no change            | COG1136V                           |

|        |      |                          |                                                                    |                                                                                            |     |     |               |                       |
|--------|------|--------------------------|--------------------------------------------------------------------|--------------------------------------------------------------------------------------------|-----|-----|---------------|-----------------------|
| MA2280 | 274  | <a href="#">20091118</a> | <a href="#">molybdenum ABC transporter, solute-binding protein</a> | <a href="#">molybdate-binding protein (modA)</a>                                           | CL3 | nd  | no change     | COG0725P              |
| MA2286 | 430  | <a href="#">20091124</a> | <a href="#">amino acid transporter</a>                             | <a href="#">Amino acid transporter domain protein</a>                                      | CL4 | nd  | no change     | COG0531E              |
| MA2289 | 99   | <a href="#">20091127</a> | <a href="#">decarboxylase</a>                                      | <a href="#">(mdrA)</a>                                                                     | CL3 | Yes | more specific | COG0599S              |
| MA2318 | 77   | <a href="#">20091154</a> | <a href="#">hypothetical protein MA2318</a>                        | <a href="#">Protein with DUF1328 domain</a>                                                | CL4 | nd  | more specific | -                     |
| MA2387 | 144  | <a href="#">20091218</a> | <a href="#">hypothetical protein MA2387</a>                        | <a href="#">Protein of unknown function (DUF1699)</a>                                      | CL4 | nd  | more specific | -                     |
| MA2388 | 133  | <a href="#">20091219</a> | <a href="#">hypothetical protein MA2388</a>                        | <a href="#">Hypothetical protein</a>                                                       | CL5 | nd  | no change     | -                     |
| MA2405 | 80   | <a href="#">20091236</a> | <a href="#">hypothetical protein MA2405</a>                        | <a href="#">Hypothetical protein</a>                                                       | CL5 | nd  | no change     | -                     |
| MA2407 | 296  | <a href="#">20091238</a> | <a href="#">pyruvate synthase, beta subunit (porB)</a>             | <a href="#">(pyruvate:ferredoxin oxidoreductase beta subunit) (EC 1.2.7.1)</a>             | CL2 | nd  | no change     | COG1013C              |
| MA2424 | 213  | <a href="#">20091255</a> | <a href="#">dimethylamine corrinoid protein</a>                    | <a href="#">dimethylamine corrinoid protein (mtbC)</a>                                     | CL2 | nd  | no change     | COG5012R              |
| MA2429 | 227  | <a href="#">20091260</a> | <a href="#">hypothetical protein MA2429</a>                        | <a href="#">Hypothetical protein</a>                                                       | CL5 | nd  | no change     | -                     |
| MA2431 | 1058 | <a href="#">20091262</a> | <a href="#">isoleucyl-tRNA synthetase</a>                          | <a href="#">Isoleucyl-tRNA synthetase (EC 6.1.1.5)</a>                                     | CL2 | Yes | no change     | COG0060J              |
| MA2451 | 271  | <a href="#">20091282</a> | <a href="#">hypothetical protein MA2451</a>                        | <a href="#">type I restriction endonuclease</a>                                            | CL3 | nd  | more specific | COG0610V              |
| MA2452 | 368  | <a href="#">20091283</a> | <a href="#">hypothetical protein MA2452</a>                        | <a href="#">Hypothetical protein</a>                                                       | CL5 | nd  | no change     | -                     |
| MA2498 | 196  | <a href="#">20091329</a> | <a href="#">fumarate hydratase (fumB)</a>                          | <a href="#">Tartrate dehydratase / Fumarate hydratase, beta subunit</a>                    | CL3 | Yes | more specific | COG1838C              |
| MA2508 | 174  | <a href="#">20091339</a> | <a href="#">hypothetical protein MA2508</a>                        | <a href="#">DUF367</a>                                                                     | CL4 | Yes | more specific | COG2042S              |
| MA2510 | 752  | <a href="#">20091341</a> | <a href="#">DNA topoisomerase I (topA)</a>                         | <a href="#">DNA topoisomerase</a>                                                          | CL3 | Yes | no change     | COG0550L,<br>COG0551L |
| MA2518 | 307  | <a href="#">20091346</a> | <a href="#">hypothetical protein MA2518</a>                        | <a href="#">RIO2-type Serine Protein Kinase</a>                                            | CL3 | nd  | more specific | COG0478T              |
| MA2533 | 404  | <a href="#">20091361</a> | <a href="#">nicotinate phosphoribosyltransferase</a>               | <a href="#">Nicotinate phosphoribosyltransferase (pncB) (EC 2.4.2.11)</a>                  | CL2 | nd  | no change     | COG1488H              |
| MA2534 | 79   | <a href="#">20091362</a> | <a href="#">hypothetical protein MA2534</a>                        | <a href="#">hypothetical protein</a>                                                       | CL5 | nd  | no change     | -                     |
| MA2548 | 312  | <a href="#">20091375</a> | <a href="#">protein</a>                                            | <a href="#">ABC transporter, ATPase subunit</a>                                            | CL2 | nd  | no change     | COG1136V              |
| MA2557 | 69   | <a href="#">20091384</a> | <a href="#">hypothetical protein MA2557</a>                        | <a href="#">hypothetical protein</a>                                                       | CL5 | nd  | no change     | -                     |
| MA2561 | 330  | <a href="#">20091388</a> | <a href="#">hypothetical protein MA2561</a>                        | <a href="#">HATPase domain-containing multisensor signal transduction histidine kinase</a> | CL4 | nd  | more specific | COG2202T,<br>COG2203T |
| MA2584 | 896  | <a href="#">20091410</a> | <a href="#">hypothetical protein MA2584</a>                        | <a href="#">Hypothetical protein</a>                                                       | CL5 | nd  | no change     | -                     |
| MA2612 | 79   | <a href="#">20091438</a> | <a href="#">serine proteinase inhibitor</a>                        | <a href="#">serpin</a>                                                                     | CL3 | nd  | more specific | -                     |
| MA2628 | 659  | <a href="#">20091451</a> | <a href="#">glycogen debranching enzyme</a>                        | <a href="#">Hypothetical protein</a>                                                       | CL5 | Yes | less specific | COG3408G              |
| MA2656 | 345  | <a href="#">20091479</a> | <a href="#">hypothetical protein MA2656</a>                        | <a href="#">protein of unknown function with UPF0228 domain</a>                            | CL5 | nd  | more specific | -                     |
| MA2665 | 491  | <a href="#">20091488</a> | <a href="#">phosphomannomutase (pmm)</a>                           | <a href="#">Phosphoglucomutase/Phosphomannomutase</a>                                      | CL2 | nd  | more specific | COG1109G              |



|        |     |                          |                                                                           |                                                                                                                |     |     |               |                       |
|--------|-----|--------------------------|---------------------------------------------------------------------------|----------------------------------------------------------------------------------------------------------------|-----|-----|---------------|-----------------------|
| MA2667 | 804 | <a href="#">20091490</a> | <a href="#">phosphoenolpyruvate synthase (ppsA)</a>                       | <a href="#">Phosphoenolpyruvate synthase, PEP synthase</a>                                                     | CL2 | nd  | no change     | COG0574G              |
| MA2701 | 314 | <a href="#">20091525</a> | <a href="#">transposase</a>                                               | <a href="#">Transposase</a>                                                                                    | CL3 | nd  | no change     | COG3039L              |
| MA2715 | 441 | <a href="#">20091539</a> | <a href="#">O-acetylhomoserine (thiol)-lyase</a>                          | <a href="#">O-acetylhomoserine aminocarboxypropyltransferase (cysD) (EC 2.5.1.49)</a>                          | CL2 | Yes | more specific | COG2873E              |
| MA2748 | 485 | <a href="#">20091571</a> | <a href="#">transposase</a>                                               | <a href="#">transposase</a>                                                                                    | CL4 | nd  | no change     | COG3436L              |
| MA2837 | 469 | <a href="#">20091661</a> | <a href="#">sodium/alanine symporter</a>                                  | <a href="#">Sodium/alanine symporter</a>                                                                       | CL3 | nd  | no change     | COG1115E              |
| MA2842 | 351 | <a href="#">20091666</a> | <a href="#">methanol dehydrogenase regulatory protein</a>                 | <a href="#">MoxR-like AAA-3 family ATPase</a>                                                                  | CL3 | nd  | more specific | COG0714R              |
| MA2851 | 260 | <a href="#">20091675</a> | <a href="#">synthetase</a>                                                | <a href="#">synthetase</a>                                                                                     | CL1 | Yes | no change     | COG1635H              |
| MA2862 | 633 | <a href="#">20091686</a> | <a href="#">glutamyl-tRNA(Gln) amidotransferase subunit E</a>             | <a href="#">glutamyl-tRNA (Gln) amidotransferase subunit E (EC 6.3.5.7)</a>                                    | CL2 | Yes | no change     | COG2511J              |
| MA2867 | 489 | <a href="#">20091691</a> | <a href="#">polyferredoxin</a>                                            | <a href="#">4Fe-4S ferredoxin, iron-sulfur binding domain protein</a>                                          | CL4 | Yes | more specific | COG1145C              |
| MA2870 | 93  | <a href="#">20091694</a> | <a href="#">hypothetical protein MA2870</a>                               | <a href="#">Ferredoxin thioredoxin reductase-related protein</a>                                               | CL4 | Yes | more specific | COG4802C              |
| MA2896 | 635 | <a href="#">20091717</a> | <a href="#">threonyl-tRNA synthetase (thrS)</a>                           | <a href="#">Threonyl-tRNA synthetase (EC 6.1.1.3)</a>                                                          | CL3 | Yes | no change     | COG0441J              |
| MA2909 | 482 | <a href="#">20091730</a> | <a href="#">2-oxoisovalerate ferredoxin oxidoreductase, alpha subunit</a> | <a href="#">gamma subunit-like N-terminal region and pyruvate synthase beta subunit-like C-terminal region</a> | CL4 | Yes | less specific | COG1013C,<br>COG1014C |
| MA2910 | 351 | <a href="#">20091731</a> | <a href="#">2-ketoisovalerate ferredoxin reductase</a>                    | <a href="#">Pyruvate flavodoxin/ferredoxin oxidoreductase-like protein</a>                                     | CL4 | Yes | less specific | COG0674C              |
| MA2912 | 560 | <a href="#">20091733</a> | <a href="#">AMP-binding protein</a>                                       | <a href="#">(Acetate--CoA ligase) (EC 6.2.1.1)</a>                                                             | CL3 | Yes | more specific | COG0365I              |
| MA2914 | 184 | <a href="#">20091735</a> | <a href="#">transcriptional regulator</a>                                 | <a href="#">Protein with helix-turn-helix (HTH) and cupin domain</a>                                           | CL4 | Yes | more specific | COG1396K              |
| MA2935 | 342 | <a href="#">20091754</a> | <a href="#">phosphate permease</a>                                        | <a href="#">Inorganic phosphate transporter</a>                                                                | CL3 | Yes | more specific | COG0306P              |
| MA2947 | 90  | <a href="#">20091766</a> | <a href="#">hypothetical protein MA2947</a>                               | <a href="#">Hypothetical protein</a>                                                                           | CL5 | nd  | no change     | -                     |
| MA2965 | 478 | <a href="#">20091783</a> | <a href="#">transposase</a>                                               | <a href="#">Hypothetical protein</a>                                                                           | CL5 | nd  | less specific | COG5421L              |
| MA2968 | 484 | <a href="#">20091786</a> | <a href="#">hypothetical protein MA2968</a>                               | <a href="#">Protoporphyrinogen oxidase (EC 1.3.3.4)</a>                                                        | CL3 | nd  | more specific | COG1233Q              |
| MA2969 | 120 | <a href="#">20091787</a> | <a href="#">hypothetical protein MA2969</a>                               | <a href="#">Hypothetical protein</a>                                                                           | CL5 | nd  | no change     | COG2146PR             |
| MA2971 | 217 | <a href="#">20091789</a> | <a href="#">monomethylamine corrinoid protein</a>                         | <a href="#">Monomethylamine corrinoid protein (mtmC)</a>                                                       | CL2 | Yes | no change     | COG5012R              |
| MA2975 | 282 | <a href="#">20091793</a> | <a href="#">hypothetical protein MA2975</a>                               | <a href="#">Hypothetical protein</a>                                                                           | CL5 | nd  | no change     | COG0148G              |
| MA2981 | 136 | <a href="#">20091799</a> | <a href="#">hypothetical protein MA2981</a>                               | <a href="#">Hypothetical protein</a>                                                                           | CL5 | nd  | no change     | -                     |
| MA2987 | 560 | <a href="#">20091805</a> | <a href="#">anthranilate synthase component I</a>                         | <a href="#">Anthranilate synthase component 1 (trpE) (EC 4.1.3.27)</a>                                         | CL2 | Yes | no change     | COG0147EH             |

|        |     |                          |                                                                                 |                                                                                            |     |     |               |           |
|--------|-----|--------------------------|---------------------------------------------------------------------------------|--------------------------------------------------------------------------------------------|-----|-----|---------------|-----------|
| MA2991 | 403 | <a href="#">20091809</a> | <a href="#">tryptophan synthase subunit beta</a>                                | <a href="#">Tryptophan synthase beta chain 1 (trpB1) (EC 4.2.1.20)</a>                     | CL2 | Yes | no change     | COG0133E  |
| MA3006 | 171 | <a href="#">20091824</a> | <a href="#">formaldehyde-activating enzyme</a>                                  | <a href="#">enzyme, tetrahydromethanopterin-</a>                                           | CL2 | Yes | more specific | COG1795S  |
| MA3018 | 189 | <a href="#">20091836</a> | <a href="#">hypothetical protein MA3018</a>                                     | <a href="#">hypothetical protein</a>                                                       | CL5 | Yes | no change     | COG3390S  |
| MA3023 | 618 | <a href="#">20091841</a> | <a href="#">glucosamine-fructose-6-phosphate aminotransferase (isomerizing)</a> | <a href="#">synthetase, contains amidotransferase and phosphosugar isomerase domains</a>   | CL2 | Yes | no change     | COG0449M  |
| MA3024 | 437 | <a href="#">20091842</a> | <a href="#">phosphomannomutase (pmmB)</a>                                       | <a href="#">Phosphoglucomutase/Phosphomannomutase</a>                                      | CL2 | Yes | less specific | COG1109G  |
| MA3033 | 255 | <a href="#">20091851</a> | <a href="#">uroporphyrin-III C-methyltransferase</a>                            | <a href="#">Uroporphyrinogen-III C-methyltransferase (SUMT) (cysGA) (EC 2.1.1.107)</a>     | CL2 | Yes | no change     | COG0007H  |
| MA3052 | 869 | <a href="#">20091870</a> | <a href="#">valyl-tRNA synthetase (valS)</a>                                    | <a href="#">6.1.1.9)</a>                                                                   | CL3 | Yes | no change     | COG0525J  |
| MA3055 | 543 | <a href="#">20091873</a> | <a href="#">flagellar assembly protein J</a>                                    | <a href="#">type II secretion system protein F domain</a>                                  | CL3 | Yes | more specific | COG1955NU |
| MA3056 | 617 | <a href="#">20091874</a> | <a href="#">flagella accessory protein I</a>                                    | <a href="#">type II secretion system protein E</a>                                         | CL3 | nd  | more specific | COG0630NU |
| MA3057 | 238 | <a href="#">20091875</a> | <a href="#">flagellar accessory protein FlaH</a>                                | <a href="#">DNA repair protein RadA-domain containing protein</a>                          | CL4 | nd  | less specific | COG2874NU |
| MA3060 | 236 | <a href="#">20091878</a> | <a href="#">hypothetical protein MA3060</a>                                     | <a href="#">hypothetical protein MA3060</a>                                                | CL5 | nd  | no change     | -         |
| MA3061 | 190 | <a href="#">20091879</a> | <a href="#">flagellin</a>                                                       | <a href="#">flagellin</a>                                                                  | CL2 | nd  | no change     | COG1681N  |
| MA3062 | 215 | <a href="#">20091880</a> | <a href="#">flagellin</a>                                                       | <a href="#">flagellin</a>                                                                  | CL2 | nd  | no change     | COG1681N  |
| MA3063 | 270 | <a href="#">20091881</a> | <a href="#">cheR methyltransferase</a>                                          | <a href="#">CheR methyltransferase-like chemotaxis protein</a>                             | CL3 | nd  | less specific | COG1352NT |
| MA3064 | 220 | <a href="#">20091882</a> | <a href="#">chemoreceptor glutamine deamidase CheD</a>                          | <a href="#">Chemoreceptor glutamine deamidase CheD</a>                                     | CL2 | nd  | no change     | COG1871NT |
| MA3066 | 882 | <a href="#">20091884</a> | <a href="#">chemotaxis sensor histidine kinase</a>                              | <a href="#">Chemotaxis protein CheA</a>                                                    | CL2 | nd  | no change     | COG0643NT |
| MA3067 | 349 | <a href="#">20091885</a> | <a href="#">chemotaxis-specific methylesterase</a>                              | <a href="#">Chemotaxis response regulator protein-glutamate methylesterase CheB</a>        | CL2 | Yes | more specific | COG2201NT |
| MA3068 | 120 | <a href="#">20091886</a> | <a href="#">chemotaxis response regulator</a>                                   | <a href="#">Chemotaxis (CheY) protein</a>                                                  | CL2 | nd  | no change     | COG0784T  |
| MA3069 | 266 | <a href="#">20091887</a> | <a href="#">hypothetical protein MA3069</a>                                     | <a href="#">DUF439</a>                                                                     | CL4 | nd  | more specific | COG2469S  |
| MA3070 | 182 | <a href="#">20091888</a> | <a href="#">chemotaxis signal transduction coupling protein</a>                 | <a href="#">Chemotaxis protein CheW</a>                                                    | CL2 | nd  | no change     | COG0835NT |
| MA3073 | 430 | <a href="#">20091891</a> | <a href="#">hydroxymethylglutaryl-CoA reductase (NADPH)</a>                     | <a href="#">3-hydroxy-3-methylglutaryl-CoA reductase (EC 1.1.1.34)</a>                     | CL2 | Yes | no change     | COG1257I  |
| MA3085 | 424 | <a href="#">20091903</a> | <a href="#">3-isopropylmalate dehydratase, large subunit</a>                    | <a href="#">Homoaconitase large subunit (EC 4.2.1.36) (homoaconitase hydratase) (hacA)</a> | CL2 | Yes | more specific | COG0065E  |
| MA3118 | 344 | <a href="#">20091936</a> | <a href="#">surface antigen gene</a>                                            | <a href="#">NHL repeat domain (Beta propeller clan) protein</a>                            | CL4 | nd  | more specific | COG3391S  |

|        |     |                          |                                                               |                                                                                                                                        |     |     |               |           |
|--------|-----|--------------------------|---------------------------------------------------------------|----------------------------------------------------------------------------------------------------------------------------------------|-----|-----|---------------|-----------|
| MA3120 | 487 | <a href="#">20091938</a> | <a href="#">surface antigen gene</a>                          | <a href="#">NHL repeat domain (Beta propeller clan) protein</a>                                                                        | CL4 | nd  | more specific | COG3391S  |
| MA3121 | 405 | <a href="#">20091939</a> | <a href="#">hypothetical protein MA3121</a>                   | <a href="#">Hypothetical protein with PepSY-like domain (possible protease inhibitory function)</a>                                    | CL4 | nd  | more specific | COG2895P  |
| MA3122 | 445 | <a href="#">20091940</a> | <a href="#">surface antigen gene</a>                          | <a href="#">NHL repeat domain (Beta propeller clan) protein</a>                                                                        | CL4 | nd  | more specific | COG3391S  |
| MA3140 | 392 | <a href="#">20091958</a> | <a href="#">mannose-1-phosphate guanylyltransferase (GDP)</a> | <a href="#">Mannose-1-phosphate guanyltransferase (EC 2.7.7.13)</a>                                                                    | CL3 | Yes | no change     | COG1208MJ |
| MA3148 | 324 | <a href="#">20091966</a> | <a href="#">methanol dehydrogenase regulatory protein</a>     | <a href="#">MoxR-like AAA-3 family ATPase</a>                                                                                          | CL3 | Yes | more specific | COG0714R  |
| MA3152 | 115 | <a href="#">20091970</a> | <a href="#">decarboxylase</a>                                 | <a href="#">(mdrA)</a>                                                                                                                 | CL2 | Yes | more specific | COG0599S  |
| MA3154 | 287 | <a href="#">20091972</a> | <a href="#">hypothetical protein MA3154</a>                   | <a href="#">Protein of unknown function DUF1130</a>                                                                                    | CL4 | nd  | more specific | COG5483S  |
| MA3162 | 117 | <a href="#">20091980</a> | <a href="#">hypothetical protein MA3162</a>                   | <a href="#">Hypothetical zinc-binding protein</a>                                                                                      | CL4 | nd  | more specific | COG5561S  |
| MA3163 | 112 | <a href="#">20091981</a> | <a href="#">hypothetical protein MA3163</a>                   | <a href="#">Cupin-domain protein</a>                                                                                                   | CL4 | nd  | more specific | COG0662G  |
| MA3165 | 242 | <a href="#">20091983</a> | <a href="#">hypothetical protein MA3165</a>                   | <a href="#">Nitrite/sulphite reductase-related protein</a>                                                                             | CL4 | Yes | more specific | COG1251C  |
| MA3166 | 134 | <a href="#">20091984</a> | <a href="#">hypothetical protein MA3166</a>                   | <a href="#">transcriptional regulator, HxIR family</a>                                                                                 | CL4 | nd  | more specific | COG1733K  |
| MA3171 | 274 | <a href="#">20091989</a> | <a href="#">protein</a>                                       | <a href="#">ABC transporter, ATPase subunit</a>                                                                                        | CL2 | nd  | no change     | COG1136V  |
| MA3172 | 460 | <a href="#">20091990</a> | <a href="#">hypothetical protein MA3172</a>                   | <a href="#">Protein of unknown function UCP019164</a>                                                                                  | CL4 | nd  | more specific | COG1361M  |
| MA3193 | 484 | <a href="#">20092009</a> | <a href="#">amidophosphoribosyltransferase</a>                | <a href="#">Amidophosphoribosyltransferase precursor (Glutamine phosphoribosylpyrophosphate amidotransferase) (purF) (EC 2.4.2.14)</a> | CL2 | Yes | more specific | COG0034F  |
| MA3194 | 56  | <a href="#">20092010</a> | <a href="#">50S ribosomal protein L37e</a>                    | <a href="#">(rpl37e)</a>                                                                                                               | CL2 | nd  | no change     | COG2126J  |
| MA3195 | 72  | <a href="#">20092011</a> | <a href="#">small nuclear ribonucleoprotein</a>               | <a href="#">binding</a>                                                                                                                | CL2 | Yes | more specific | COG1958K  |
| MA3198 | 442 | <a href="#">20092014</a> | <a href="#">tryptophan synthase subunit beta</a>              | <a href="#">Tryptophan synthase beta chain 2 (trpB2) (EC 4.2.1.20)</a>                                                                 | CL2 | Yes | no change     | COG1350R  |
| MA3200 | 137 | <a href="#">20092016</a> | <a href="#">hypothetical protein MA3200</a>                   | <a href="#">Protein of unknown function (DUF1699)</a>                                                                                  | CL4 | nd  | more specific | -         |
| MA3203 | 730 | <a href="#">20092019</a> | <a href="#">ski2-like helicase</a>                            | <a href="#">protein</a>                                                                                                                | CL3 | nd  | no change     | COG1204R  |
| MA3204 | 588 | <a href="#">20092020</a> | <a href="#">putative ATPase RIL</a>                           | <a href="#">RNase L inhibitor</a>                                                                                                      | CL2 | Yes | more specific | COG1245R  |
| MA3211 | 135 | <a href="#">20092027</a> | <a href="#">hypothetical protein MA3211</a>                   | <a href="#">Protein of unknown function (DUF1699)</a>                                                                                  | CL4 | Yes | more specific | -         |
| MA3235 | 92  | <a href="#">20092051</a> | <a href="#">hypothetical protein MA3235</a>                   | <a href="#">ACT domain-containing protein</a>                                                                                          | CL4 | nd  | more specific | COG3830T  |
| MA3241 | 177 | <a href="#">20092057</a> | <a href="#">tRNA 2'-O-methylase</a>                           | <a href="#">tRNA 2'-O-methylase</a>                                                                                                    | CL3 | nd  | no change     | COG1303S  |
| MA3242 | 506 | <a href="#">20092058</a> | <a href="#">thymidine phosphorylase</a>                       | <a href="#">AMP to Ribose-1,5-bisphosphate)</a>                                                                                        | CL2 | Yes | more specific | COG0213F  |

|        |      |                           |                                                              |                                                                                                     |     |      |               |                    |
|--------|------|---------------------------|--------------------------------------------------------------|-----------------------------------------------------------------------------------------------------|-----|------|---------------|--------------------|
| MA3250 | 485  | <a href="#">20092066</a>  | <a href="#">cobyrinic acid synthase</a>                      | <a href="#">Cobyrinic acid synthase (cbiP) (EC 6.3.5.10)</a>                                        | CL3 | Yes  | no change     | COG1492H           |
| MA3257 | 338  | <a href="#">20092073</a>  | <a href="#">hypothetical protein MA3257</a>                  | <a href="#">Hypothetical protein with PepSY-like domain (possible protease inhibitory function)</a> | CL4 | nd   | more specific | -                  |
| MA3269 | 115  | <a href="#">20092085</a>  | <a href="#">peptidyl-tRNA hydrolase</a>                      | <a href="#">Peptidyl-tRNA hydrolase (EC 3.1.1.29)</a>                                               | CL2 | Yes  | no change     | COG1990S           |
| MA3279 | 534  | <a href="#">20092094</a>  | <a href="#">CTP synthetase</a>                               | <a href="#">CTP synthase (UTP--ammonia ligase) (pyrG) (EC 6.3.4.2)</a>                              | CL2 | Yes  | no change     | COG0504F           |
| MA3281 | 60   | <a href="#">20092096</a>  | <a href="#">hypothetical protein MA3281</a>                  | <a href="#">DUF343</a>                                                                              | CL4 | nd   | more specific | COG2835S           |
| MA3288 | 451  | <a href="#">20092103</a>  | <a href="#">PmbA/TldD family protein</a>                     | <a href="#">peptidase U62 (DNA gyrase modulator) family protein</a>                                 | CL3 | Yes  | no change     | COG0312R           |
| MA3303 | 73   | <a href="#">20092118</a>  | <a href="#">hypothetical protein MA3303</a>                  | <a href="#">Hypothetical protein</a>                                                                | CL5 | Yes  | no change     | -                  |
| MA3309 | 441  | <a href="#">20092124</a>  | <a href="#">phosphoribosylamine-glycine ligase</a>           | <a href="#">ligase (GARS) (purD) (EC 6.3.4.13)</a>                                                  | CL2 | Yes  | no change     | COG0151F           |
| MA3310 | 302  | <a href="#">20092125</a>  | <a href="#">ornithine carbamoyltransferase</a>               | <a href="#">Ornithine carbamoyltransferase (EC 2.1.3.3)</a>                                         | CL2 | Yes  | no change     | COG0078E           |
| MA3317 | 380  | <a href="#">20092131</a>  | <a href="#">arylsulfatase regulator</a>                      | <a href="#">protein of unknown function UCP021940</a>                                               | CL4 | Yes* | less specific | COG0641R           |
| MA3322 | 200  | <a href="#">20092136</a>  | <a href="#">hypothetical protein MA3322</a>                  | <a href="#">FMN-binding protein</a>                                                                 | CL4 | Yes  | more specific | COG1853R           |
| MA3337 | 190  | <a href="#">20092151</a>  | <a href="#">hypothetical protein MA3337</a>                  | <a href="#">Hypothetical protein</a>                                                                | CL5 | nd   | no change     | -                  |
| MA3342 | 405  | <a href="#">20092156</a>  | <a href="#">trans-homoaconitate synthase (akaS)</a>          | <a href="#">(R)-citramalate synthase (cimA) (EC 2.3.3.-)</a>                                        | CL2 | Yes  | more specific | COG0119E           |
| MA3345 | 335  | <a href="#">20092159</a>  | <a href="#">glyceraldehyde-3-phosphate dehydrogenase</a>     | <a href="#">glyceraldehyde-3-phosphate dehydrogenase</a>                                            | CL2 | Yes  | no change     | COG0057G           |
| MA3361 | 370  | <a href="#">20092175</a>  | <a href="#">transposase</a>                                  | <a href="#">transposase</a>                                                                         | CL4 | Yes  | no change     | COG0675L           |
| MA3368 | 1447 | <a href="#">20092182</a>  | <a href="#">sensory transduction histidine kinase</a>        | <a href="#">Multisensor signal transduction histidine kinase</a>                                    | CL4 | Yes  | no change     | COG0642T, COG2202T |
| MA3373 | 553  | <a href="#">20092187</a>  | <a href="#">dihydroxy-acid dehydratase (ilvD)</a>            | <a href="#">Dihydroxyacid dehydratase, EC 4.2.1.9</a>                                               | CL2 | Yes  | no change     | COG0129EG          |
| MA3378 | 96   | <a href="#">20092192</a>  | <a href="#">hypothetical protein MA3378</a>                  | <a href="#">hypothetical protein</a>                                                                | CL5 | Yes  | no change     | COG0640K           |
| MA3384 | 73   | <a href="#">20092198</a>  | <a href="#">hypothetical protein MA3384</a>                  | <a href="#">PepSY domain protein</a>                                                                | CL4 | nd   | more specific | -                  |
| MA3388 | 424  | <a href="#">20092202</a>  | <a href="#">serine protease inhibitor</a>                    | <a href="#">serpin</a>                                                                              | CL3 | nd   | more specific | COG4826O           |
| MA3404 | 254  | <a href="#">20092216</a>  | <a href="#">GTPase</a>                                       | <a href="#">GTP-binding protein</a>                                                                 | CL3 | nd   | less specific | COG1161R           |
| MA3408 | 802  | <a href="#">20092220</a>  | <a href="#">phosphoenolpyruvate synthase</a>                 | <a href="#">Phosphoenolpyruvate synthase, PEP synthase</a>                                          | CL2 | Yes  | no change     | COG0574G           |
| MA3416 | 203  | <a href="#">161484933</a> | <a href="#">30S ribosomal protein S3Ae</a>                   | <a href="#">SSU ribosomal protein S3Ae (rps3Ae)</a>                                                 | CL2 | Yes  | no change     | COG1890J           |
| MA3451 | 424  | <a href="#">20092263</a>  | <a href="#">iron ABC transporter, solute-binding protein</a> | <a href="#">transporter substrate binding protein</a>                                               | CL3 | Yes  | no change     | COG0614P           |
| MA3452 | 377  | <a href="#">20092264</a>  | <a href="#">iron ABC transporter, permease</a>               | <a href="#">Iron complex/Vitamin B12 ABC transporter permease protein</a>                           | CL3 | Yes  | no change     | COG0609P           |

|        |     |                          |                                                                                                         |                                                                                                                                        |     |     |               |           |
|--------|-----|--------------------------|---------------------------------------------------------------------------------------------------------|----------------------------------------------------------------------------------------------------------------------------------------|-----|-----|---------------|-----------|
| MA3453 | 292 | <a href="#">20092265</a> | <a href="#">protein</a>                                                                                 | <a href="#">ABC transporter, ATPase subunit</a>                                                                                        | CL2 | nd  | more specific | COG1120PH |
| MA3468 | 160 | <a href="#">20092281</a> | <a href="#">hypothetical protein MA3468</a>                                                             | <a href="#">iron dependent repressor</a>                                                                                               | CL3 | nd  | more specific | COG1321K  |
| MA3496 | 183 | <a href="#">20092306</a> | <a href="#">pyruvoyl-dependent arginine decarboxylase</a>                                               | <a href="#">Pyruvoyl-dependent arginine decarboxylase (EC 4.1.1.19)</a>                                                                | CL3 | Yes | no change     | COG1945S  |
| MA3516 | 444 | <a href="#">20092324</a> | <a href="#">dihydropteroate synthase</a>                                                                | <a href="#">dihydropteroate synthase (DHPS) (folP) (EC 2.5.1.15)</a>                                                                   | CL3 | Yes | no change     | COG0294H  |
| MA3519 | 290 | <a href="#">20092327</a> | <a href="#">methylenetetrahydrofolate dehydrogenase (NADP+)/methenyltetrahydrofolate cyclohydrolase</a> | <a href="#">(Includes: Methylenetetrahydrofolate dehydrogenase (EC 1.5.1.5); Methenyltetrahydrofolate cyclohydrolase (EC 3.5.4.9))</a> | CL2 | Yes | no change     | COG0190H  |
| MA3520 | 412 | <a href="#">20092328</a> | <a href="#">glycine hydroxymethyltransferase</a>                                                        | <a href="#">Serine hydroxymethyltransferase (EC 2.1.2.1)</a>                                                                           | CL2 | Yes | more specific | COG0112E  |
| MA3522 | 216 | <a href="#">20092330</a> | <a href="#">phosphoribosylglycinamide formyltransferase</a>                                             | <a href="#">Phosphoribosylglycinamide formyltransferase (purN) (EC 2.1.2.2)</a>                                                        | CL2 | Yes | no change     | COG0299F  |
| MA3524 | 328 | <a href="#">20092332</a> | <a href="#">hypothetical protein MA3524</a>                                                             | <a href="#">HTH DNA-binding domain protein</a>                                                                                         | CL4 | nd  | more specific | COG1395K  |
| MA3527 | 786 | <a href="#">20092335</a> | <a href="#">cell division control protein 48 AAA family protein (cdc48)</a>                             | <a href="#">VCP-like ATPase (VAT), AAA family</a>                                                                                      | CL2 | Yes | more specific | COG0464O  |
| MA3529 | 485 | <a href="#">20092337</a> | <a href="#">transposase</a>                                                                             | <a href="#">transposase</a>                                                                                                            | CL4 | nd  | no change     | COG3436L  |
| MA3545 | 325 | <a href="#">20092352</a> | <a href="#">DNA repair and recombination protein RadA</a>                                               | <a href="#">DNA repair and recombination protein radA</a>                                                                              | CL2 | Yes | no change     | COG0468L  |
| MA3547 | 110 | <a href="#">20092354</a> | <a href="#">hypothetical protein MA3547</a>                                                             | <a href="#">Hypothetical protein</a>                                                                                                   | CL5 | Yes | no change     | -         |
| MA3551 | 453 | <a href="#">20092358</a> | <a href="#">cobalt ABC transporter, ATP-binding protein</a>                                             | <a href="#">Cobalt ABC transporter ATP-binding protein cbiO</a>                                                                        | CL3 | Yes | no change     | COG1122P  |
| MA3554 | 235 | <a href="#">20092361</a> | <a href="#">cobalt transport protein CbiM</a>                                                           | <a href="#">protein involved in cobalamin biosynthesis, cbiM</a>                                                                       | CL2 | nd  | no change     | COG0310P  |
| MA3564 | 395 | <a href="#">20092370</a> | <a href="#">acetyltransferase/N-acetylglutamate synthase protein</a>                                    | <a href="#">(EC 2.3.1.35)</a>                                                                                                          | CL2 | Yes | no change     | COG1364E  |
| MA3566 | 336 | <a href="#">20092372</a> | <a href="#">N-acetyl-gamma-glutamyl-phosphate reductase (argJ)</a>                                      | <a href="#">N-acetyl-gamma-glutamyl-phosphate reductase (EC 1.2.1.38) (N-acetyl-glutamate semialdehyde dehydrogenase)</a>              | CL2 | nd  | no change     | COG0002E  |
| MA3576 | 365 | <a href="#">20092380</a> | <a href="#">hypothetical protein MA3576</a>                                                             | <a href="#">Small-conductance mechanosensitive ion channel</a>                                                                         | CL3 | Yes | more specific | -         |
| MA3582 | 230 | <a href="#">20092386</a> | <a href="#">protein</a>                                                                                 | <a href="#">ABC transporter, ATPase subunit</a>                                                                                        | CL2 | nd  | no change     | COG1136V  |
| MA3583 | 402 | <a href="#">20092387</a> | <a href="#">protein</a>                                                                                 | <a href="#">DUF214</a>                                                                                                                 | CL4 | nd  | less specific | COG0577V  |
| MA3584 | 409 | <a href="#">20092388</a> | <a href="#">hypothetical protein MA3584</a>                                                             | <a href="#">Hypothetical protein</a>                                                                                                   | CL5 | Yes | no change     | COG1361M  |
| MA3586 | 214 | <a href="#">20092389</a> | <a href="#">TetR family transcriptional regulator</a>                                                   | <a href="#">Hypothetical protein</a>                                                                                                   | CL5 | Yes | less specific | COG1309K  |
| MA3592 | 416 | <a href="#">20092393</a> | <a href="#">phosphoglycerate kinase</a>                                                                 | <a href="#">2.7.2.3</a>                                                                                                                | CL2 | Yes | no change     | COG0126G  |
| MA3601 | 209 | <a href="#">20092402</a> | <a href="#">hypothetical protein MA3601</a>                                                             | <a href="#">Hypothetical protein</a>                                                                                                   | CL5 | nd  | no change     | COG2512S  |

|        |     |                          |                                                                                                                      |                                                                                                                                                                                                                      |     |     |               |                    |
|--------|-----|--------------------------|----------------------------------------------------------------------------------------------------------------------|----------------------------------------------------------------------------------------------------------------------------------------------------------------------------------------------------------------------|-----|-----|---------------|--------------------|
| MA3619 | 94  | <a href="#">20092419</a> | <a href="#">MC1</a>                                                                                                  | <a href="#">Chromosomal protein MC1</a>                                                                                                                                                                              | CL2 | nd  | no change     | -                  |
| MA3627 | 265 | <a href="#">20092427</a> | <a href="#">nitrogenase (iron protein)</a>                                                                           | <a href="#">Nitrogenase iron protein (EC:1.18.6.1)</a>                                                                                                                                                               | CL2 | nd  | no change     | COG1348P           |
| MA3628 | 370 | <a href="#">20092428</a> | <a href="#">nitrogenase-related protein</a>                                                                          | <a href="#">Protein containing oxidoreductase/nitrogenase component 1-like domain</a>                                                                                                                                | CL4 | Yes | more specific | COG2710C           |
| MA3631 | 130 | <a href="#">20092431</a> | <a href="#">sirohydrochlorin cobaltochelataase</a>                                                                   | <a href="#">cobaltochelataase (CbiXS) (EC 4.99.1.3)</a>                                                                                                                                                              | CL2 | Yes | no change     | COG2138S           |
| MA3665 | 717 | <a href="#">20092465</a> | <a href="#">hypothetical protein MA3665</a>                                                                          | <a href="#">Hypothetical protein</a>                                                                                                                                                                                 | CL5 | nd  | no change     | COG1203R           |
| MA3670 | 321 | <a href="#">20092470</a> | <a href="#">hypothetical protein MA3670</a>                                                                          | <a href="#">CRISPR-associated protein Cas1 containing DUF48 domain</a>                                                                                                                                               | CL4 | nd  | more specific | COG1518L           |
| MA3680 | 342 | <a href="#">20092480</a> | <a href="#">sulfate adenylyltransferase (ADP)</a>                                                                    | <a href="#">UDP-galactose/glucose pyrophosphorylase (EC 2.7.7.-)</a>                                                                                                                                                 | CL3 | nd  | more specific | COG1085C           |
| MA3686 | 356 | <a href="#">20092486</a> | <a href="#">NAD(P)-dependent glycerol-1-phosphate dehydrogenase</a>                                                  | <a href="#">glycerol-1-phosphate dehydrogenase (EC 1.1.1.261)</a>                                                                                                                                                    | CL2 | Yes | no change     | COG0371C           |
| MA3689 | 387 | <a href="#">20092489</a> | <a href="#">5-formaminoimidazole-4-carboxamide-1-(beta)-D-ribofuranosyl 5'-monophosphate synthetase-like protein</a> | <a href="#">5-formaminoimidazole-4-carboxamide-1-(beta)-D-ribofuranosyl 5'-monophosphate synthetase (EC 6.3.4.-) (5-aminoimidazole-4-carboxamide-1-beta-D-ribofuranosyl 5'-monophosphate--formate ligase) (purP)</a> | CL2 | Yes | more specific | COG1759R           |
| MA3690 | 443 | <a href="#">20092490</a> | <a href="#">translation initiation factor IF-2 subunit gamma</a>                                                     | <a href="#">translation initiation factor a/eIF-2 gamma subunit</a>                                                                                                                                                  | CL2 | Yes | no change     | COG5257J           |
| MA3692 | 194 | <a href="#">20092492</a> | <a href="#">DNA-directed RNA polymerase subunit E'</a>                                                               | <a href="#">DNA-directed RNA polymerase subunit E', rpoE1</a>                                                                                                                                                        | CL2 | Yes | no change     | COG1095K           |
| MA3696 | 54  | <a href="#">20092496</a> | <a href="#">30S ribosomal protein S27ae</a>                                                                          | <a href="#">SSU ribosomal protein S27AE (rps27ae)</a>                                                                                                                                                                | CL2 | nd  | no change     | COG1998J           |
| MA3705 | 547 | <a href="#">20092505</a> | <a href="#">O-sialoglycoprotein endopeptidase/protein kinase</a>                                                     | <a href="#">with atypical AP endonuclease activity</a>                                                                                                                                                               | CL2 | Yes | more specific | COG0533O, COG3642T |
| MA3706 | 184 | <a href="#">20092506</a> | <a href="#">Ham1 protein</a>                                                                                         | <a href="#">Nucleotide-triphosphatase (EC 3.6.1.-)</a>                                                                                                                                                               | CL2 | Yes | more specific | COG0127F           |
| MA3710 | 68  | <a href="#">20092509</a> | <a href="#">hypothetical protein MA3710</a>                                                                          | <a href="#">hypothetical protein MA3710</a>                                                                                                                                                                          | CL5 | nd  | no change     | COG1145C           |
| MA3720 | 370 | <a href="#">20092518</a> | <a href="#">transposase</a>                                                                                          | <a href="#">transposase</a>                                                                                                                                                                                          | CL4 | nd  | no change     | COG0675L           |
| MA3722 | 89  | <a href="#">20092519</a> | <a href="#">hypothetical protein MA3722</a>                                                                          | <a href="#">Hypothetical protein</a>                                                                                                                                                                                 | CL5 | nd  | no change     | -                  |
| MA3732 | 346 | <a href="#">20092529</a> | <a href="#">F420H2 dehydrogenase subunit F</a>                                                                       | <a href="#">F420H2 dehydrogenase subunit F (fpoF)</a>                                                                                                                                                                | CL2 | Yes | no change     | COG1035C           |



|        |     |                          |                                                               |                                                                                                                                                                                                                                        |     |     |               |                       |
|--------|-----|--------------------------|---------------------------------------------------------------|----------------------------------------------------------------------------------------------------------------------------------------------------------------------------------------------------------------------------------------|-----|-----|---------------|-----------------------|
| MA3733 | 328 | <a href="#">20092530</a> | <a href="#">methylene tetrahydromethanopterin reductase</a>   | <a href="#">Coenzyme F420-dependent N(5),N(10)-methylene tetrahydromethanopterin reductase (mer) (EC 1.5.99.11)</a>                                                                                                                    | CL2 | Yes | no change     | COG2141C              |
| MA3734 | 76  | <a href="#">20092532</a> | <a href="#">hypothetical protein MA3734</a>                   | <a href="#">Hydantoinase/oxoprolinase</a>                                                                                                                                                                                              | CL3 | Yes | more specific | COG4855S              |
| MA3736 | 117 | <a href="#">20092534</a> | <a href="#">carboxymuconolactone decarboxylase</a>            | <a href="#">protein disulfide reductase (mdrA)</a>                                                                                                                                                                                     | CL1 | Yes | more specific | COG0599S              |
| MA3740 | 221 | <a href="#">20092538</a> | <a href="#">iron-sulfur flavoprotein</a>                      | <a href="#">reductase</a>                                                                                                                                                                                                              | CL3 | Yes | more specific | COG0655R              |
| MA3741 | 207 | <a href="#">20092539</a> | <a href="#">flavoprotein</a>                                  | <a href="#">Protein with flavoprotein domain</a>                                                                                                                                                                                       | CL4 | Yes | less specific | COG1036C              |
| MA3751 | 166 | <a href="#">20092549</a> | <a href="#">3-isopropylmalate dehydratase</a>                 | <a href="#">3-Isopropylmalate dehydratase small subunit (3-isopropylmalate isomerase small subunit) and homoaconitase small subunit - dual specificity</a>                                                                             | CL2 | Yes | more specific | COG0066E              |
| MA3757 | 351 | <a href="#">20092555</a> | <a href="#">mannosyltransferase B</a>                         | <a href="#">hypothetical protein</a>                                                                                                                                                                                                   | CL5 | nd  | less specific | COG0438M              |
| MA3777 | 238 | <a href="#">20092573</a> | <a href="#">glucose-1-phosphate thymidyltransferase</a>       | <a href="#">Glucose-1-phosphate thymidyltransferase (dTDP-glucose synthase) (EC:2.7.7.24)</a>                                                                                                                                          | CL2 | Yes | no change     | COG1209M              |
| MA3778 | 269 | <a href="#">20092574</a> | <a href="#">dTDP-4-dehydrorhamnose reductase</a>              | <a href="#">dTDP-4-dehydrorhamnose reductase (EC:1.1.1.133)</a>                                                                                                                                                                        | CL2 | Yes | no change     | COG1091M              |
| MA3779 | 318 | <a href="#">20092575</a> | <a href="#">dTDP-glucose 4,6-dehydratase</a>                  | <a href="#">dTDP-glucose 4,6-dehydratase</a>                                                                                                                                                                                           | CL2 | nd  | no change     | COG1088M              |
| MA3780 | 183 | <a href="#">20092576</a> | <a href="#">dTDP-4-dehydrorhamnose 3,5-epimerase</a>          | <a href="#">dTDP-4-dehydrorhamnose 3,5-epimerase related protein</a>                                                                                                                                                                   | CL3 | Yes | no change     | COG1898M              |
| MA3781 | 460 | <a href="#">20092577</a> | <a href="#">mannose-1-phosphate guanylyltransferase (GDP)</a> | <a href="#">Xanthan-like biosynthesis protein (Includes: Mannose-6-phosphate isomerase (Phosphomannose isomerase) (PMI) (Phosphohexomutase); Mannose-1-phosphate guanylyl transferase (GDP) (GDP-mannose pyrophosphorylase) (GMP))</a> | CL2 | Yes | more specific | COG0662G,<br>COG0836M |
| MA3787 | 469 | <a href="#">20092583</a> | <a href="#">putative oxidoreductase</a>                       | <a href="#">(flavoprotein) subunit SudA (EC 1.97.-.-)</a>                                                                                                                                                                              | CL2 | Yes | more specific | COG0493ER             |
| MA3790 | 335 | <a href="#">20092586</a> | <a href="#">ketol-acid reductoisomerase</a>                   | <a href="#">Ketol-acid reductoisomerase (EC 1.1.1.86) (Acetohydroxy-acid isomeroreductase)</a>                                                                                                                                         | CL2 | Yes | no change     | COG0059EH             |
| MA3791 | 161 | <a href="#">20092587</a> | <a href="#">acetolactate synthase 3 regulatory subunit</a>    | <a href="#">acetolactate synthase, small subunit (EC 2.2.1.6)</a>                                                                                                                                                                      | CL2 | Yes | no change     | COG0440E              |

|        |                     |                          |                                                                         |                                                                                                                                          |      |     |               |           |
|--------|---------------------|--------------------------|-------------------------------------------------------------------------|------------------------------------------------------------------------------------------------------------------------------------------|------|-----|---------------|-----------|
| MA3792 | 564                 | <a href="#">20092588</a> | <a href="#">acetolactate synthase 3 catalytic subunit</a>               | <a href="#">acetolactate synthase, large subunit (acetohydroxyacid synthase) (EC 2.2.1.6)</a>                                            | CL2  | Yes | no change     | COG0028EH |
| MA3793 | 483                 | <a href="#">20092589</a> | <a href="#">(R)-citramalate synthase</a>                                | <a href="#">(R)-citramalate synthase (cimA) (EC 2.3.3.-)</a>                                                                             | CL2  | Yes | no change     | COG0119E  |
| MA3800 | 413                 | <a href="#">20092596</a> | <a href="#">transposase</a>                                             | <a href="#">Hypothetical protein</a>                                                                                                     | CL5  | nd  | less specific | COG5421L  |
| MA3840 | 362                 | <a href="#">20092636</a> | <a href="#">hypothetical protein MA3840</a>                             | <a href="#">Hypothetical protein</a>                                                                                                     | CL5  | nd  | no change     | COG4748S  |
| MA3845 | 126                 | <a href="#">20092641</a> | <a href="#">hypothetical protein MA3845</a>                             | <a href="#">Hypothetical protein</a>                                                                                                     | CL5  | nd  | no change     | -         |
| MA3849 | 348                 | <a href="#">20092645</a> | <a href="#">cellulase</a>                                               | <a href="#">Archaeal aminopeptidase or endoglucanase M (cellulase M)</a>                                                                 | CL2  | Yes | more specific | COG1363G  |
| MA3850 | 117                 | <a href="#">20092646</a> | <a href="#">prefoldin, subunit beta</a>                                 | <a href="#">Prefoldin beta subunit (GimC beta subunit) (pfdB)</a>                                                                        | CL2  | Yes | no change     | COG1382O  |
| MA3851 | 334                 | <a href="#">20092647</a> | <a href="#">phosphotransferase</a>                                      | <a href="#">RecJ-like protein</a>                                                                                                        | CL4  | nd  | less specific | COG0618R  |
| MA3852 | 485                 | <a href="#">20092648</a> | <a href="#">transposase</a>                                             | <a href="#">transposase</a>                                                                                                              | CL4  | Yes | no change     | COG3436L  |
| MA3853 | 434                 | <a href="#">20092649</a> | <a href="#">coenzyme F390 synthetase</a>                                | <a href="#">Phenylacetate-coenzyme A ligase (EC 6.2.1.30)</a>                                                                            | CL2  | Yes | more specific | COG1541H  |
| MA3854 | 145                 | <a href="#">20092650</a> | <a href="#">subunit</a>                                                 | <a href="#">protein</a>                                                                                                                  | CL4  | Yes | less specific | COG4747R  |
| MA3857 | 195                 | <a href="#">20092653</a> | <a href="#">hypothetical protein MA3857</a>                             | <a href="#">DUF88</a>                                                                                                                    | CL4  | Yes | more specific | COG1432S  |
| MA3860 | 805                 | <a href="#">20092656</a> | <a href="#">acetyl-CoA decarboxylase/synthase complex subunit alpha</a> | <a href="#">Acetyl-CoA decarboxylase/synthase complex alpha subunit 2 (EC 1.2.99.2)</a>                                                  | CL2  | Yes | no change     | COG1152C  |
| MA3861 | <a href="#">170</a> | <a href="#">20092657</a> | <a href="#">carbon-monoxide dehydrogenase accessory protein</a>         | <a href="#">carbon-monoxide dehydrogenase accessory protein</a>                                                                          | CL2  | Yes | no change     | COG3640D  |
| MA3862 | 470                 | <a href="#">20092658</a> | <a href="#">decarboxylase/synthase complex subunit beta</a>             | <a href="#">decarboxylase/synthase complex beta subunit (EC 2.3.1.-)</a>                                                                 | CL2  | Yes | no change     | COG1614C  |
| MA3863 | 253                 | <a href="#">20092659</a> | <a href="#">carbon-monoxide dehydrogenase accessory protein</a>         | <a href="#">carbon monoxide dehydrogenase/acetyl-CoA synthase complex, nickel-inserting subunit (cooC)</a>                               | CL3? | Yes | no change     | COG3640D  |
| MA3864 | 436                 | <a href="#">20092660</a> | <a href="#">decarboxylase/synthase complex subunit delta</a>            | <a href="#">decarboxylase/synthase complex delta subunit</a>                                                                             | CL2  | Yes | no change     | COG2069C  |
| MA3865 | 468                 | <a href="#">20092661</a> | <a href="#">decarboxylase/synthase complex subunit gamma</a>            | <a href="#">decarboxylase/synthase complex gamma subunit (EC 2.1.1.-)</a>                                                                | CL2  | Yes | no change     | COG1456C  |
| MA3874 | 637                 | <a href="#">20092670</a> | <a href="#">cleavage and polyadenylation specificity factor</a>         | <a href="#">RNA-metabolizing metallo-beta-lactamase protein</a>                                                                          | CL3  | Yes | more specific | COG1782R  |
| MA3876 | 392                 | <a href="#">20092672</a> | <a href="#">cell division protein FtsZ</a>                              | <a href="#">Cell division protein FtsZ</a>                                                                                               | CL2  | Yes | no change     | COG0206D  |
| MA3880 | 671                 | <a href="#">20092676</a> | <a href="#">membrane-bound proton-translocating pyrophosphatase</a>     | <a href="#">Pyrophosphate-energized proton pump / Pyrophosphate-energized inorganic pyrophosphatase (H(+)-PPase) (EC 3.6.1.1) (hppA)</a> | CL2  | nd  | no change     | COG3808C  |
| MA3884 | 126                 | <a href="#">20092680</a> | <a href="#">hypothetical protein MA3884</a>                             | <a href="#">Protein of unknown function DUF1621</a>                                                                                      | CL4  | Yes | more specific | COG2450S  |

|        |     |                          |                                                                                |                                                                                                                                                                                                                                                 |     |     |               |                    |
|--------|-----|--------------------------|--------------------------------------------------------------------------------|-------------------------------------------------------------------------------------------------------------------------------------------------------------------------------------------------------------------------------------------------|-----|-----|---------------|--------------------|
| MA3886 | 480 | <a href="#">20092682</a> | <a href="#">prolyl-tRNA synthetase</a>                                         | <a href="#">6.1.1.15</a>                                                                                                                                                                                                                        | CL2 | Yes | no change     | COG0442J           |
| MA3937 | 350 | <a href="#">20092733</a> | <a href="#">hypothetical protein MA3937</a>                                    | <a href="#">permease</a>                                                                                                                                                                                                                        | CL4 | nd  | more specific | COG0701R           |
| MA3938 | 77  | <a href="#">20092734</a> | <a href="#">hypothetical protein MA3938</a>                                    | <a href="#">Thioredoxin (EC 1.8.4.8)</a>                                                                                                                                                                                                        | CL2 | nd  | more specific | COG0526OC          |
| MA3942 | 79  | <a href="#">20092738</a> | <a href="#">hypothetical protein MA3942</a>                                    | <a href="#">small redox protein</a>                                                                                                                                                                                                             | CL3 | nd  | more specific | COG0526OC          |
| MA3957 | 213 | <a href="#">20092753</a> | <a href="#">protein</a>                                                        | <a href="#">ABC transporter, ATPase subunit</a>                                                                                                                                                                                                 | CL2 | nd  | no change     | COG1136V           |
| MA3960 | 302 | <a href="#">20092756</a> | <a href="#">protein</a>                                                        | <a href="#">ABC transporter, ATPase subunit</a>                                                                                                                                                                                                 | CL2 | nd  | no change     | COG1136V           |
| MA3969 | 247 | <a href="#">20092764</a> | <a href="#">geranylgeranylgeranyl glyceryl phosphate synthase-like protein</a> | <a href="#">geranylgeranylgeranyl glyceryl phosphate synthase (EC 2.5.1.42)</a>                                                                                                                                                                 | CL3 | Yes | more specific | COG1646R           |
| MA3971 | 451 | <a href="#">20092766</a> | <a href="#">adenylosuccinate lyase</a>                                         | <a href="#">adenylosuccinate lyase (purB) (EC 4.3.2.2)</a>                                                                                                                                                                                      | CL2 | Yes | no change     | COG0015F           |
| MA3987 | 128 | <a href="#">20092781</a> | <a href="#">translation initiation factor IF-5A</a>                            | <a href="#">translation initiation factor aIF-5A</a>                                                                                                                                                                                            | CL2 | Yes | no change     | COG0231J           |
| MA3994 | 415 | <a href="#">20092789</a> | <a href="#">BadF/BadG/BcrA/BcrD ATPase</a>                                     | <a href="#">2-hydroxyglutaryl-CoA dehydratase component A</a>                                                                                                                                                                                   | CL3 | nd  | more specific | COG1924I           |
| MA3995 | 170 | <a href="#">20092790</a> | <a href="#">hypothetical protein MA3995</a>                                    | <a href="#">protein of unknown function UCP018781</a>                                                                                                                                                                                           | CL4 | Yes | more specific | COG4050S           |
| MA3998 | 537 | <a href="#">20092793</a> | <a href="#">ABC transporter, ATP-binding protein</a>                           | <a href="#">Methylcoenzyme M reductase system component A2</a>                                                                                                                                                                                  | CL2 | Yes | more specific | COG1123R           |
| MA4002 | 100 | <a href="#">20092797</a> | <a href="#">hypothetical protein MA4002</a>                                    | <a href="#">Hypothetical protein</a>                                                                                                                                                                                                            | CL5 | nd  | no change     | -                  |
| MA4007 | 521 | <a href="#">20092802</a> | <a href="#">phosphoglyceromutase</a>                                           | <a href="#">Cofactor-independent Phosphoglycerate mutase</a>                                                                                                                                                                                    | CL2 | Yes | no change     | COG0696G           |
| MA4008 | 201 | <a href="#">20092803</a> | <a href="#">Fun34 related protein</a>                                          | <a href="#">protein</a>                                                                                                                                                                                                                         | CL4 | nd  | more specific | COG1584S           |
| MA4012 | 538 | <a href="#">20092807</a> | <a href="#">phosphoribosylaminoimidazolecarboxamide formyltransferase</a>      | <a href="#">Bifunctional purine biosynthesis protein purH (Includes: Phosphoribosylaminoimidazolecarboxamide formyltransferase (EC 2.1.2.3) (AICAR transformylase); IMP cyclohydrolase (EC 3.5.4.10) (Inosinicase) (IMP synthetase) (ATIC))</a> | CL2 | Yes | no change     | COG0138F           |
| MA4033 | 456 | <a href="#">20092826</a> | <a href="#">surface antigen gene</a>                                           | <a href="#">NHL repeat domain (Beta propeller clan) protein</a>                                                                                                                                                                                 | CL4 | Yes | more specific | COG3391S           |
| MA4036 | 310 | <a href="#">20092829</a> | <a href="#">protein</a>                                                        | <a href="#">ABC transporter, ATPase subunit</a>                                                                                                                                                                                                 | CL3 | nd  | more specific | COG1131V           |
| MA4037 | 250 | <a href="#">20092830</a> | <a href="#">hypothetical protein MA4037</a>                                    | <a href="#">hypothetical protein</a>                                                                                                                                                                                                            | CL5 | nd  | no change     | COG1277R           |
| MA4038 | 125 | <a href="#">20092831</a> | <a href="#">hypothetical protein MA4038</a>                                    | <a href="#">Hypothetical protein</a>                                                                                                                                                                                                            | CL5 | nd  | no change     | -                  |
| MA4040 | 246 | <a href="#">20092833</a> | <a href="#">hypothetical protein MA4040</a>                                    | <a href="#">HTH DNA-binding domain protein</a>                                                                                                                                                                                                  | CL4 | Yes | more specific | COG1709K           |
| MA4041 | 349 | <a href="#">20092834</a> | <a href="#">hypothetical protein MA4041</a>                                    | <a href="#">3-hydroxy-3-methylglutaryl-CoA synthase (EC 4.1.3.5)</a>                                                                                                                                                                            | CL3 | Yes | more specific | COG3425I           |
| MA4042 | 390 | <a href="#">20092835</a> | <a href="#">acetyl-CoA acetyltransferase</a>                                   | <a href="#">Acetoacetyl-CoA thiolase (EC 2.3.1.9)</a>                                                                                                                                                                                           | CL3 | Yes | more specific | COG0183I           |
| MA4043 | 132 | <a href="#">20092836</a> | <a href="#">hypothetical protein MA4043</a>                                    | <a href="#">DUF35-domain protein</a>                                                                                                                                                                                                            | CL4 | Yes | more specific | COG1545R           |
| MA4046 | 712 | <a href="#">20092839</a> | <a href="#">methionyl-tRNA synthetase</a>                                      | <a href="#">Methionyl-tRNA synthetase (6.1.1.10)</a>                                                                                                                                                                                            | CL2 | Yes | no change     | COG0073R, COG0143J |

|        |     |                          |                                                                          |                                                                                                                  |     |     |               |          |
|--------|-----|--------------------------|--------------------------------------------------------------------------|------------------------------------------------------------------------------------------------------------------|-----|-----|---------------|----------|
| MA4052 | 396 | <a href="#">20092845</a> | <a href="#">alpha-amylase</a>                                            | <a href="#">Glycoside hydrolase family 57 protein</a>                                                            | CL4 | Yes | more specific | COG1449G |
| MA4055 | 715 | <a href="#">20092848</a> | <a href="#">phosphoribosylformylglycinamide synthase II</a>              | <a href="#">Phosphoribosylformylglycinamide synthase II (FGAM synthase II) (purL) (EC 6.3.5.3)</a>               | CL2 | nd  | no change     | COG0046F |
| MA4059 | 102 | <a href="#">20092852</a> | <a href="#">translation initiation factor Sui1</a>                       | <a href="#">translation initiation factor SUI1</a>                                                               | CL2 | Yes | no change     | COG0023J |
| MA4060 | 121 | <a href="#">20092853</a> | <a href="#">hypothetical protein MA4060</a>                              | <a href="#">Hypothetical protein</a>                                                                             | CL5 | Yes | no change     | COG2522R |
| MA4061 | 408 | <a href="#">20092854</a> | <a href="#">hypothetical protein MA4061</a>                              | <a href="#">protein of unknown function with DUF650 and DUF651 domains</a>                                       | CL4 | nd  | more specific | COG1602S |
| MA4063 | 262 | <a href="#">20092856</a> | <a href="#">phosphoribosylaminoimidazole-succinocarboxamide synthase</a> | <a href="#">Phosphoribosylaminoimidazole-succinocarboxamide synthase (SAICAR synthetase) (purC) (EC 6.3.2.6)</a> | CL2 | nd  | no change     | COG0152F |
| MA4064 | 428 | <a href="#">20092857</a> | <a href="#">hypothetical protein MA4064</a>                              | <a href="#">AAA-family ATPase</a>                                                                                | CL3 | nd  | more specific | COG0464O |
| MA4073 | 74  | <a href="#">20092866</a> | <a href="#">hypothetical protein MA4073</a>                              | <a href="#">Hypothetical protein</a>                                                                             | CL5 | nd  | no change     | -        |
| MA4075 | 140 | <a href="#">20092868</a> | <a href="#">regulator</a>                                                | <a href="#">Nickel-responsive regulator</a>                                                                      | CL3 | Yes | more specific | COG0864K |
| MA4080 | 114 | <a href="#">20092873</a> | <a href="#">hypothetical protein MA4080</a>                              | <a href="#">Hypothetical protein</a>                                                                             | CL5 | Yes | no change     | -        |
| MA4093 | 284 | <a href="#">20092886</a> | <a href="#">hypothetical protein MA4093</a>                              | <a href="#">synthase) domain-containing protein</a>                                                              | CL4 | Yes | more specific | COG0517R |
| MA4099 | 138 | <a href="#">20092892</a> | <a href="#">hypothetical protein MA4099</a>                              | <a href="#">DUF356</a>                                                                                           | CL4 | nd  | more specific | COG1844S |
| MA4100 | 447 | <a href="#">20092893</a> | <a href="#">gamma-glutamyl phosphate reductase</a>                       | <a href="#">dehydrogenase (proA) (EC 1.2.1.41)</a>                                                               | CL1 | Yes | no change     | COG0014E |
| MA4101 | 385 | <a href="#">20092894</a> | <a href="#">gamma-glutamyl kinase</a>                                    | <a href="#">Glutamate 5-kinase (proB) (EC 2.7.2.11)</a>                                                          | CL1 | Yes | no change     | COG0263E |
| MA4102 | 270 | <a href="#">20092895</a> | <a href="#">pyrroline-5-carboxylate reductase</a>                        | <a href="#">Pyrroline-5-carboxylate reductase (proC) (EC 1.5.1.2)</a>                                            | CL1 | Yes | no change     | COG0345E |
| MA4103 | 219 | <a href="#">20092896</a> | <a href="#">peroxiredoxin</a>                                            | <a href="#">3-Cys thioredoxin peroxidase (EC 1.11.1.15)</a>                                                      | CL2 | Yes | more specific | COG0450O |
| MA4109 | 417 | <a href="#">20092902</a> | <a href="#">signal recognition particle receptor</a>                     | <a href="#">signal recognition docking protein FtsY</a>                                                          | CL2 | Yes | more specific | COG0552U |
| MA4111 | 61  | <a href="#">20092904</a> | <a href="#">50S ribosomal protein LX</a>                                 | <a href="#">LSU ribosomal protein LX (rplX)</a>                                                                  | CL2 | Yes | no change     | COG2157J |
| MA4114 | 51  | <a href="#">20092907</a> | <a href="#">50S ribosomal protein L39e</a>                               | <a href="#">(rpl39e)</a>                                                                                         | CL2 | Yes | no change     | COG2167J |
| MA4116 | 122 | <a href="#">20092909</a> | <a href="#">hypothetical protein MA4116</a>                              | <a href="#">protein</a>                                                                                          | CL2 | Yes | more specific | COG2118R |
| MA4117 | 149 | <a href="#">20092910</a> | <a href="#">30S ribosomal protein S19e</a>                               | <a href="#">(rps19e)</a>                                                                                         | CL2 | Yes | no change     | COG2238J |
| MA4118 | 424 | <a href="#">20092911</a> | <a href="#">adenylosuccinate synthetase</a>                              | <a href="#">Adenylosuccinate synthetase (purA) (EC 6.3.4.4)</a>                                                  | CL2 | Yes | no change     | COG0104F |
| MA4123 | 340 | <a href="#">20092916</a> | <a href="#">proteasome-activating nucleotidase</a>                       | <a href="#">Proteasome-activating nucleotidase (Proteasome regulatory subunit) (pan)</a>                         | CL2 | Yes | no change     | COG1222O |
| MA4151 | 402 | <a href="#">20092944</a> | <a href="#">protein</a>                                                  | <a href="#">Radical SAM family protein</a>                                                                       | CL4 | Yes | more specific | COG0535R |
| MA4154 | 82  | <a href="#">20092947</a> | <a href="#">H(+)-transporting ATP synthase, subunit C</a>                | <a href="#">H(+)-transporting ATP synthase, subunit K (EC 3.6.3.14)</a>                                          | CL2 | Yes | more specific | COG0636C |

|        |     |                          |                                                             |                                                                                                                         |     |     |               |          |
|--------|-----|--------------------------|-------------------------------------------------------------|-------------------------------------------------------------------------------------------------------------------------|-----|-----|---------------|----------|
| MA4157 | 101 | <a href="#">20092950</a> | <a href="#">V-type ATP synthase subunit F</a>               | <a href="#">V-type ATP synthase subunit F (atpF) (EC 3.6.3.14)</a>                                                      | CL2 | Yes | no change     | COG1436C |
| MA4158 | 578 | <a href="#">20092951</a> | <a href="#">V-type ATP synthase subunit A</a>               | <a href="#">V-type ATP synthase alpha chain (atpA) (EC 3.6.3.14)</a>                                                    | CL2 | Yes | no change     | COG1155C |
| MA4159 | 460 | <a href="#">20092952</a> | <a href="#">V-type ATP synthase subunit B</a>               | <a href="#">V-type ATP synthase beta chain (atpB) (EC 3.6.3.14)</a>                                                     | CL2 | Yes | no change     | COG1156C |
| MA4160 | 209 | <a href="#">20092953</a> | <a href="#">V-type ATP synthase subunit D</a>               | <a href="#">V-type ATP synthase subunit D (atpD) (EC 3.6.3.14)</a>                                                      | CL2 | Yes | no change     | COG1394C |
| MA4169 | 135 | <a href="#">20092962</a> | <a href="#">hypothetical protein MA4169</a>                 | <a href="#">Protein of unknown function (DUF1699)</a>                                                                   | CL4 | Yes | more specific | -        |
| MA4171 | 153 | <a href="#">20092964</a> | <a href="#">hypothetical protein MA4171</a>                 | <a href="#">Protein of unknown function (DUF1699)</a>                                                                   | CL4 | nd  | more specific | -        |
| MA4174 | 346 | <a href="#">20092967</a> | <a href="#">formylmethanofuran dehydrogenase, subunit F</a> | <a href="#">reductase iron-sulfur subunit A (hdrA) with C-terminal mvhD-like electron transfer domain (EC 1.8.98.1)</a> | CL2 | nd  | more specific | COG1145C |
| MA4175 | 584 | <a href="#">20092968</a> | <a href="#">formylmethanofuran dehydrogenase, subunit A</a> | <a href="#">Molybdenum formylmethanofuran dehydrogenase subunit A (fmdA) (EC 1.2.99.5)</a>                              | CL2 | Yes | more specific | COG1229C |
| MA4177 | 129 | <a href="#">20092970</a> | <a href="#">formylmethanofuran dehydrogenase, subunit D</a> | <a href="#">Molybdenum formylmethanofuran dehydrogenase subunit D (fmdD) (EC 1.2.99.5)</a>                              | CL2 | Yes | more specific | COG1153C |
| MA4178 | 433 | <a href="#">20092971</a> | <a href="#">formylmethanofuran dehydrogenase, subunit B</a> | <a href="#">Molybdenum formylmethanofuran dehydrogenase subunit B (fmdB) (EC 1.2.99.5)</a>                              | CL2 | nd  | more specific | COG1029C |
| MA4194 | 58  | <a href="#">20092985</a> | <a href="#">ferredoxin</a>                                  | <a href="#">4Fe-4S ferredoxin, iron-sulfur protein</a>                                                                  | CL4 | nd  | no change     | COG1145C |
| MA4195 | 323 | <a href="#">20092986</a> | <a href="#">nitrogen fixation protein</a>                   | <a href="#">FeMo cofactor biosynthesis protein nifB</a>                                                                 | CL2 | Yes | more specific | COG0535R |
| MA4196 | 120 | <a href="#">20092987</a> | <a href="#">6-pyruvoyltetrahydropterin synthase</a>         | <a href="#">6-pyruvoyl tetrahydrobiopterin synthase (PTPS) (EC 4.2.3.12)</a>                                            | CL2 | nd  | no change     | COG0720H |
| MA4198 | 186 | <a href="#">20092989</a> | <a href="#">hypothetical protein MA4198</a>                 | <a href="#">protein</a>                                                                                                 | CL4 | Yes | more specific | COG2029S |
| MA4226 | 211 | <a href="#">20093016</a> | <a href="#">hypothetical protein MA4226</a>                 | <a href="#">Hypothetical protein</a>                                                                                    | CL5 | nd  | no change     | -        |
| MA4230 | 315 | <a href="#">20093020</a> | <a href="#">hypothetical protein MA4230</a>                 | <a href="#">Hypothetical protein</a>                                                                                    | CL5 | nd  | no change     | -        |
| MA4245 | 112 | <a href="#">20093035</a> | <a href="#">HTH DNA Binding protein</a>                     | <a href="#">DUF134</a>                                                                                                  | CL4 | Yes | more specific | COG1342R |
| MA4258 | 240 | <a href="#">20093048</a> | <a href="#">precorrin-8X methylmutase</a>                   | <a href="#">Cobalt-precorrin-8X methylmutase cbiC (EC 5.4.1.-)</a>                                                      | CL3 | Yes | no change     | COG2082H |
| MA4259 | 266 | <a href="#">20093049</a> | <a href="#">precorrin-3B C17-methyltransferase</a>          | <a href="#">methyltransferase cbiH (EC 2.1.1.-)</a>                                                                     | CL2 | Yes | more specific | COG1010H |
| MA4261 | 242 | <a href="#">20093050</a> | <a href="#">precorrin-4 C11-methyltransferase</a>           | <a href="#">methyltransferase cbiF (EC 2.1.1.-)</a>                                                                     | CL2 | Yes | more specific | COG2875H |

|        |     |                          |                                                                                         |                                                                                                  |     |      |               |           |
|--------|-----|--------------------------|-----------------------------------------------------------------------------------------|--------------------------------------------------------------------------------------------------|-----|------|---------------|-----------|
| MA4262 | 202 | <a href="#">20093051</a> | <a href="#">cobalt-precorrin-2 C(20)-methyltransferase</a>                              | <a href="#">cobalt-precorrin-2 C(20)-methyltransferase (cbiL)(EC 2.1.1.151)</a>                  | CL3 | nd   | no change     | COG2243H  |
| MA4264 | 443 | <a href="#">20093053</a> | <a href="#">isopropylmalate/homocitrate/citramalate synthase family protein</a>         | <a href="#">Re-Citrate Synthase</a>                                                              | CL2 | Yes  | more specific | COG0119E  |
| MA4265 | 342 | <a href="#">20093054</a> | <a href="#">isocitrate/isopropylmalate dehydrogenase family protein</a>                 | <a href="#">Isocitrate/isopropylmalate dehydrogenase</a>                                         | CL2 | Yes  | more specific | COG0473CE |
| MA4266 | 280 | <a href="#">20093055</a> | <a href="#">hypothetical protein MA4266</a>                                             | <a href="#">TatD-related deoxyribonuclease</a>                                                   | CL4 | Yes  | more specific | COG1831R  |
| MA4271 | 374 | <a href="#">20093060</a> | <a href="#">cell division protein FtsZ</a>                                              | <a href="#">Cell division protein FtsZ</a>                                                       | CL2 | Yes  | no change     | COG0206D  |
| MA4273 | 156 | <a href="#">20093062</a> | <a href="#">transcription antitermination protein NusG</a>                              | <a href="#">LSU ribosomal protein L26e (rpl26e) (NusG)</a>                                       | CL3 | Yes  | no change     | COG0250K  |
| MA4274 | 161 | <a href="#">20093063</a> | <a href="#">50S ribosomal protein L11P</a>                                              | <a href="#">(rpl11p)</a>                                                                         | CL2 | Yes  | no change     | COG0080J  |
| MA4275 | 213 | <a href="#">20093064</a> | <a href="#">50S ribosomal protein L1P</a>                                               | <a href="#">(rpl1p)</a>                                                                          | CL2 | Yes  | no change     | COG0081J  |
| MA4277 | 104 | <a href="#">20093066</a> | <a href="#">50S ribosomal protein L12P</a>                                              | <a href="#">(rpl12p)</a>                                                                         | CL2 | Yes  | no change     | COG2058J  |
| MA4329 | 428 | <a href="#">20093117</a> | <a href="#">thiamine biosynthesis protein ThiC</a>                                      | <a href="#">Thiamine biosynthesis protein thiC (thiC)</a>                                        | CL2 | Yes  | no change     | COG0422H  |
| MA4331 | 183 | <a href="#">20093119</a> | <a href="#">transcription factor</a>                                                    | <a href="#">TATA-box binding protein TBP3</a>                                                    | CL1 | Yes  | more specific | COG2101K  |
| MA4349 | 294 | <a href="#">20093137</a> | <a href="#">branched-chain amino acid aminotransferase</a>                              | <a href="#">Branched-chain amino acid aminotransferase (ilvE) (Transaminase B) (EC 2.6.1.42)</a> | CL2 | Yes  | no change     | COG0115EH |
| MA4351 | 364 | <a href="#">20093139</a> | <a href="#">GTP-binding protein</a>                                                     | <a href="#">domain</a>                                                                           | CL2 | Yes  | more specific | COG1163R  |
| MA4378 | 929 | <a href="#">20093165</a> | <a href="#">sodium/potassium-transporting ATPase, alpha subunit</a>                     | <a href="#">Cation-transporter, P-type ATPase (EC 3.6.3.-)</a>                                   | CL2 | Yes  | less specific | COG0474P  |
| MA4379 | 342 | <a href="#">20093166</a> | <a href="#">methylcobalamin:coenzyme M methyltransferase</a>                            | <a href="#">methanol-specific methylcobalamin:CoM methyltransferase (mtaA)</a>                   | CL1 | Yes  | more specific | COG0407H  |
| MA4380 | 539 | <a href="#">2E +7</a>    | <a href="#">hypothetical protein</a>                                                    | <a href="#">corrinoind activation protein (ramM)</a>                                             | CL2 | Yes  | more specific |           |
| MA4382 | 451 | <a href="#">20093169</a> | <a href="#">CobW protein</a>                                                            | <a href="#">nucleotide-binding CobW/HypB/UreG-like protein</a>                                   | CL4 | Yes* | less specific | COG0523R  |
| MA4388 | 83  | <a href="#">20093175</a> | <a href="#">hypothetical protein MA4388</a>                                             | <a href="#">Hypothetical protein</a>                                                             | CL5 | nd   | no change     | -         |
| MA4391 | 258 | <a href="#">20093178</a> | <a href="#">methanol-5-hydroxybenzimidazolycobamide co-methyltransferase, isozyme 2</a> | <a href="#">corrinoind-containing methyl-accepting protein (mtaC2)</a>                           | CL1 | Yes* | more specific | COG5012R  |
| MA4392 | 461 | <a href="#">20093179</a> | <a href="#">methanol-5-hydroxybenzimidazolycobamide co-methyltransferase, isozyme 2</a> | <a href="#">methanol-5-hydroxybenzimidazolycobamide co-methyltransferase MtaB2 (EC 2.1.1.90)</a> | CL1 | Yes  | no change     | -         |
| MA4399 | 805 | <a href="#">20093186</a> | <a href="#">acetyl-CoA decarboxylase/synthase complex subunit alpha</a>                 | <a href="#">Acetyl-CoA decarboxylase/synthase complex alpha subunit 2 (EC 1.2.99.2)</a>          | CL2 | Yes  | no change     | COG1152C  |



|        |     |                          |                                                                                       |                                                                                                     |     |     |               |           |
|--------|-----|--------------------------|---------------------------------------------------------------------------------------|-----------------------------------------------------------------------------------------------------|-----|-----|---------------|-----------|
| MA4401 | 394 | <a href="#">20093188</a> | <a href="#">translation-associated GTPase</a>                                         | <a href="#">GTP-binding protein</a>                                                                 | CL2 | Yes | less specific | COG0012J  |
| MA4406 | 247 | <a href="#">20093193</a> | <a href="#">protein</a>                                                               | <a href="#">atypical ABC-ATPase SufC</a>                                                            | CL2 | Yes | more specific | COG0396O  |
| MA4407 | 407 | <a href="#">20093194</a> | <a href="#">hypothetical protein MA4407</a>                                           | <a href="#">sufB</a>                                                                                | CL4 | Yes | more specific | COG0719O  |
| MA4413 | 543 | <a href="#">20093200</a> | <a href="#">Hsp60</a>                                                                 | <a href="#">(Chaperonin)</a>                                                                        | CL2 | Yes | no change     | COG0459O  |
| MA4415 | 252 | <a href="#">20093202</a> | <a href="#">3-isopropylmalate dehydratase</a>                                         | <a href="#">DUF75-domain conserved<br/>archaeal protein</a>                                         | CL4 | Yes | less specific | COG1938R  |
| MA4425 | 123 | <a href="#">20093211</a> | <a href="#">hypothetical protein MA4425</a>                                           | <a href="#">hypothetical protein</a>                                                                | CL5 | nd  | no change     | COG4744S  |
| MA4428 | 285 | <a href="#">20093214</a> | <a href="#">hypothetical protein MA4428</a>                                           | <a href="#">Hypothetical protein</a>                                                                | CL5 | Yes | no change     | COG1340S  |
| MA4430 | 279 | <a href="#">20093216</a> | <a href="#">F420-dependent<br/>methylenetetrahydromethanopterin<br/>dehydrogenase</a> | <a href="#">F420-dependent<br/>methylenetetrahydromethanopterin<br/>dehydrogenase (EC 1.5.99.9)</a> | CL2 | Yes | no change     | COG1927C  |
| MA4438 | 600 | <a href="#">20093224</a> | <a href="#">hypothetical protein MA4438</a>                                           |                                                                                                     | CL5 | Yes | no change     | -         |
| MA4448 | 311 | <a href="#">20093234</a> | <a href="#">myo-inositol 2-dehydrogenase</a>                                          | <a href="#">Oxidoreductase (NAD- or NADP-<br/>binding)-like protein</a>                             | CL3 | nd  | less specific | COG0673R  |
| MA4457 | 427 | <a href="#">20093243</a> | <a href="#">UDP-glucose 6-dehydrogenase</a>                                           | <a href="#">UDP-glucose/GDP-mannose<br/>dehydrogenase family protein</a>                            | CL2 | nd  | less specific | COG1004M  |
| MA4459 | 318 | <a href="#">20093245</a> | <a href="#">UTP-glucose-1-phosphate<br/>uridylyltransferase</a>                       | <a href="#">UDP-glucose pyrophosphorylase</a>                                                       | CL2 | Yes | more specific | COG1210M  |
| MA4460 | 320 | <a href="#">20093246</a> | <a href="#">dTDP-glucose 4,6-dehydratase</a>                                          | <a href="#">UDP-galactose -4-epimerase</a>                                                          | CL3 | Yes | more specific | COG0451MG |
| MA4472 | 64  | <a href="#">20093257</a> | <a href="#">30S ribosomal protein S17e</a>                                            | <a href="#">(rps17e)</a>                                                                            | CL2 | Yes | no change     | COG1383J  |
| MA4474 | 263 | <a href="#">20093259</a> | <a href="#">dihydrodipicolinate reductase</a>                                         | <a href="#">Dihydrodipicolinate reductase<br/>(EC 1.3.1.26)</a>                                     | CL2 | Yes | no change     | COG0289E  |
| MA4485 | 151 | <a href="#">20093270</a> | <a href="#">hypothetical protein MA4485</a>                                           | <a href="#">Hypothetical protein</a>                                                                | CL5 | nd  | no change     | -         |
| MA4511 | 305 | <a href="#">20093296</a> | <a href="#">GMP synthase subunit B</a>                                                | <a href="#">hydrolyzing) subunit B (EC<br/>6.3.5.2)</a>                                             | CL2 | Yes | no change     | COG0519F  |
| MA4515 | 299 | <a href="#">20093300</a> | <a href="#">acetylglutamate kinase</a>                                                | <a href="#">2.7.2.8)</a>                                                                            | CL2 | Yes | no change     | COG0548E  |
| MA4516 | 94  | <a href="#">20093301</a> | <a href="#">MC1</a>                                                                   | <a href="#">Chromosomal protein MC1</a>                                                             | CL2 | nd  | no change     | -         |
| MA4517 | 335 | <a href="#">20093302</a> | <a href="#">GTP cyclohydrolase</a>                                                    | <a href="#">GTP cyclohydrolase MptA (EC<br/>3.5.4.-)</a>                                            | CL2 | Yes | no change     | COG1469S  |
| MA4519 | 477 | <a href="#">20093304</a> | <a href="#">hypothetical protein MA4519</a>                                           | <a href="#">protein of unknown function<br/>UCP016937</a>                                           | CL4 | Yes | more specific | COG4065S  |
| MA4522 | 93  | <a href="#">20093307</a> | <a href="#">aspartyl/glutamyl-tRNA<br/>amidotransferase subunit C</a>                 | <a href="#">Aspartyl/Glutamyl-tRNA<br/>(Asn/Gln) amidotransferase<br/>subunit C (EC 6.3.5.-)</a>    | CL2 | Yes | no change     | COG0721J  |
| MA4523 | 476 | <a href="#">20093308</a> | <a href="#">glutamyl-tRNA (Gln)<br/>amidotransferase, subunit A</a>                   | <a href="#">glutamyl-tRNA (Gln)<br/>amidotransferase subunit A (EC<br/>6.3.5.-)</a>                 | CL2 | Yes | no change     | COG0154J  |
| MA4524 | 495 | <a href="#">20093309</a> | <a href="#">aspartyl/glutamyl-tRNA<br/>amidotransferase subunit B</a>                 | <a href="#">Aspartyl/Glutamyl-tRNA<br/>(Asn/Gln) amidotransferase<br/>subunit B (EC 6.3.5.-)</a>    | CL2 | Yes | no change     | COG0064J  |
| MA4532 | 258 | <a href="#">20093317</a> | <a href="#">iron compounds ABC transporter,<br/>ATP-binding protein</a>               | <a href="#">ABC transporter, ATPase subunit</a>                                                     | CL2 | nd  | less specific | COG1120PH |

|        |      |                           |                                                                                             |                                                                                                                                                  |     |     |               |                     |
|--------|------|---------------------------|---------------------------------------------------------------------------------------------|--------------------------------------------------------------------------------------------------------------------------------------------------|-----|-----|---------------|---------------------|
| MA4542 | 286  | <a href="#">20093326</a>  | <a href="#">small heat shock protein</a>                                                    | <a href="#">Peptidase, M48 family</a>                                                                                                            | CL4 | Yes | more specific | COG0501O            |
| MA4543 | 230  | <a href="#">20093327</a>  | <a href="#">thymidylate synthase</a>                                                        | <a href="#">2.1.1.45</a>                                                                                                                         | CL2 | Yes | no change     | COG0207F            |
| MA4546 | 570  | <a href="#">20093330</a>  | <a href="#">methyl coenzyme M reductase, subunit alpha</a>                                  | <a href="#">subunit alpha (mcrA) (EC 2.8.4.1)</a>                                                                                                | CL2 | Yes | no change     | COG4058H            |
| MA4547 | 248  | <a href="#">20093331</a>  | <a href="#">methyl coenzyme M reductase, subunit gamma</a>                                  | <a href="#">subunit gamma (mcrG) (EC 2.8.4.1)</a>                                                                                                | CL2 | Yes | no change     | COG4057H            |
| MA4548 | 206  | <a href="#">20093332</a>  | <a href="#">methyl coenzyme M reductase, subunit D</a>                                      | <a href="#">coenzyme M reductase operon protein C (mcrC) with unknown function</a>                                                               | CL2 | Yes | less specific | COG4056H            |
| MA4550 | 434  | <a href="#">20093334</a>  | <a href="#">methyl coenzyme M reductase, subunit beta</a>                                   | <a href="#">methyl-coenzyme M reductase, subunit beta (mcrB) (EC 2.8.4.1)</a>                                                                    | CL2 | Yes | no change     | COG4054H            |
| MA4552 | 1145 | <a href="#">20093336</a>  | <a href="#">DNA polymerase II large subunit</a>                                             | <a href="#">DNA polymerase II, large subunit</a>                                                                                                 | CL2 | Yes | no change     | COG1933L            |
| MA4569 | 518  | <a href="#">20093353</a>  | <a href="#">putative monovalent cation/H+ antiporter subunit D</a>                          | <a href="#">Na+/H+ antiporter subunit</a>                                                                                                        | CL2 | Yes | no change     | COG0651CP           |
| MA4572 | 806  | <a href="#">20093356</a>  | <a href="#">putative monovalent cation/H+ antiporter subunit A</a>                          | <a href="#">Na+/H+ antiporter subunit</a>                                                                                                        | CL2 | Yes | more specific | COG1009CP, COG2111P |
| MA4575 | 753  | <a href="#">20093359</a>  | <a href="#">cell division control protein 48</a>                                            | <a href="#">CDC48, AAA family ATPase</a>                                                                                                         | CL3 | Yes | more specific | COG0464O            |
| MA4587 | 440  | <a href="#">20093371</a>  | <a href="#">Srp54</a>                                                                       | <a href="#">signal recognition particle SRP54</a>                                                                                                | CL2 | Yes | no change     | COG0541U            |
| MA4590 | 189  | <a href="#">20093374</a>  | <a href="#">GMP synthase subunit A</a>                                                      | <a href="#">hydrolyzing) subunit A (EC 6.3.5.2)</a>                                                                                              | CL2 | nd  | no change     | COG0518F            |
| MA4591 | 265  | <a href="#">20093375</a>  | <a href="#">fructose-bisphosphate aldolase</a>                                              | <a href="#">2-amino-3,7-dideoxy-D-threo-hept-6-ulosonate synthase CL2</a>                                                                        | CL2 | Yes | more specific | COG1830G            |
| MA4592 | 380  | <a href="#">20093376</a>  | <a href="#">3-dehydroquinate synthase</a>                                                   | <a href="#">3-dehydroquinate synthase (EC 4.6.1.3)</a>                                                                                           | CL2 | Yes | no change     | COG1465E            |
| MA4594 | 280  | <a href="#">20093378</a>  | <a href="#">shikimate 5-dehydrogenase</a>                                                   | <a href="#">Shikimate dehydrogenase (aroE) (EC 1.1.1.25)</a>                                                                                     | CL2 | Yes | no change     | COG0169E            |
| MA4607 | 222  | <a href="#">20093391</a>  | <a href="#">triosephosphate isomerase</a>                                                   | <a href="#">Triosephosphate isomerase EC 5.3.1.1</a>                                                                                             | CL2 | Yes | no change     | COG0149G            |
| MA4608 | 392  | <a href="#">20093392</a>  | <a href="#">bifunctional formaldehyde-activating enzyme/3-hexulose-6-phosphate synthase</a> | <a href="#">(Includes: Formaldehyde-activating enzyme (Fae) (EC 4.3.-.-) &amp; 3-hexulose-6-phosphate synthase (HPS) (EC 4.1.2.-)) (fae_hps)</a> | CL2 | Yes | no change     | COG0269G, COG1795S  |
| MA4615 | 515  | <a href="#">20093396</a>  | <a href="#">2-isopropylmalate synthase</a>                                                  | <a href="#">2-isopropylmalate synthase (EC 2.3.3.13)</a>                                                                                         | CL2 | Yes | no change     | COG0119E            |
| MA4618 | 614  | <a href="#">161484932</a> | <a href="#">hypothetical protein MA4618</a>                                                 | <a href="#">protein of unknown function UPF0313</a>                                                                                              | CL4 | nd  | more specific | COG1032C            |
| MA4628 | 301  | <a href="#">20093407</a>  | <a href="#">reverse transcriptase</a>                                                       | <a href="#">Reverse transcriptase, RNA dependent DNA polymerase</a>                                                                              | CL4 | nd  | no change     | COG3344L            |
| MA4635 | 519  | <a href="#">20093414</a>  | <a href="#">DNA primase</a>                                                                 | <a href="#">Toprim (topoisomerase-primase) domain protein</a>                                                                                    | CL4 | Yes | more specific | COG0358L            |
| MA4642 | 127  | <a href="#">20093421</a>  | <a href="#">hypothetical protein MA4642</a>                                                 | <a href="#">hypothetical protein</a>                                                                                                             | CL5 | nd  | no change     | COG4744S            |

|        |     |                          |                                                       |                                                             |     |     |               |          |
|--------|-----|--------------------------|-------------------------------------------------------|-------------------------------------------------------------|-----|-----|---------------|----------|
| MA4652 | 263 | <a href="#">20093431</a> | <a href="#">hypothetical protein MA4652</a>           | <a href="#">DUF124</a>                                      | CL4 | Yes | more specific | COG2013S |
| MA4657 | 104 | <a href="#">20093436</a> | <a href="#">hypothetical protein MA4657</a>           | <a href="#">Hypothetical protein</a>                        | CL5 | nd  | no change     | -        |
| MA4668 | 79  | <a href="#">20091114</a> | <a href="#">transcriptional regulator</a>             | <a href="#">containing transcriptional regulator</a>        | CL3 | nd  | more specific | COG1476K |
| MA4672 | 45  | <a href="#">20090625</a> | <a href="#">DNA-directed RNA polymerase subunit P</a> | <a href="#">DNA-directed RNA polymerase subunit P, rpoP</a> | CL2 | nd  | no change     | COG1996K |
| MA4675 | 512 | <a href="#">20091516</a> | <a href="#">transposase</a>                           | <a href="#">Hypothetical protein</a>                        | CL5 | nd  | less specific | COG0675L |

(a) based on Allen, MA et al., 2009, ISME J. 3: 1012-1035 unless indicated otherwise.

(b) based on Ferguson, JT et al, 2009, J. Am. Soc. Mass Spect. 20: 1743-1750; Li, L et al, J. Prot Res. 2007 6: 759-771; Rohlin L & Gunsalus RP. 2010 BMC Microbiol. 10:62.
